# Supplementary material for: Electrochemical synthesis of dipyrazolo/dipyrimidine-fused pyridines via oxidative domino cyclization of C(sp3)–H bonds
Source: Royal Society of Chemistry journal article supplement (doi:10.1039/d1qo01641e), 2022-01-01

## Supporting Information

### Electrochemical synthesis of dipyrazolo/dipyrimidine-fused pyridines via oxidative domino cyclization of C(sp<sup>3</sup>)-H bonds

Peng Qian,\* Linna Xu, Wenyan Wang, Lin Zhang, Liang Tang, Jiaojiao Liu, Liangquan Sheng\*

School of Chemistry and Material Engineering, Engineering Research Center of Biomass Conversion and Pollution Prevention of Anhui Educational Institutions, Fuyang Normal University, Fuyang, Anhui, 236037, P. R. China.

E-mail: qianpeng@mail.ustc.edu.cn shenglq2015@163.com

### Table of Contents

|                                       |     |
|---------------------------------------|-----|
| General Information.....              | S2  |
| Experimental Section.....             | S2  |
| Detail Descriptions for Products..... | S7  |
| Copies of Product NMR Spectra.....    | S17 |

## General Information:

All products were characterized by  $^1\text{H}$  NMR and  $^{13}\text{C}$  NMR, using TMS as an internal reference ( $^1\text{H}$  NMR: 400 MHz,  $^{13}\text{C}$  NMR: 100 MHz). HRMS (ESI) data were recorded on a Q-TOF Premier. Flash column chromatography was performed using silica gel (200-300 mesh). All the compounds **1**, **2**, **4** and **6** were purchased from commercial supplies and used without purification.

## Experimental Section

**Representative Procedures for the Synthesis of 3 (3aa as an Example):** An undivided cell was equipped with a magnet stirrer, two platinum plates (1.0 x 1.0 cm<sup>2</sup>) electrodes as the working electrode and counter electrode (as shown in Figure S1). In the electrolytic cell, a mixture of 2-methylquinoline **1a** (0.3 mmol, 43.0 mg, 1.0 equiv), 3-methyl-1-phenyl-1H-pyrazol-5-amine **2a** (0.60 mmol, 103.9 mg, 2.0 equiv),  $\text{NH}_4\text{I}$  (0.3 mmol, 43.5 mg, 1.0 equiv), DMF (3.0 mL) was allowed to stir and electrolyze at a constant current conditions (10 mA) at oil bath (120 °C) (the electrolysis setup is shown in Figure S2). After the reaction was completed (15 h), 30 mL water was added and extracted with EtOAc 3 times (3×30 mL). The extract was dried over anhydrous  $\text{Na}_2\text{SO}_4$ . Then the solvent was removed with a rotary evaporator and the residue was purified by column chromatography on silica gel to afford the desired product **3aa** (117.0 mg, 84%). The product was dried under high vacuum for at least 0.5 h before it was weighed and characterized by NMR spectroscopy.

**Representative Procedures for the Synthesis of 5 (5aa as an Example):** An undivided cell was equipped with a magnet stirrer, two platinum plates (1.0 x 1.0 cm<sup>2</sup>) electrodes as the working electrode and counter electrode. In the electrolytic cell, a mixture of 2-methylquinoline **1a** (0.3 mmol, 43.0 mg, 1.0 equiv), 6-amino-1,3-dimethylpyrimidine-2,4(1H,3H)-dione **4a** (0.6 mmol, 93.1 mg, 2.0 equiv),  $\text{NH}_4\text{I}$  (0.3 mmol, 43.5 mg, 1.0 equiv), DMF (3.0 mL) was allowed to stir and electrolyze at a constant current conditions (10 mA) at oil bath (120 °C). After the reaction was completed (15 h), 30 mL water was added and extracted with EtOAc 3 times (3×30 mL). The extract was dried over anhydrous  $\text{Na}_2\text{SO}_4$ . Then the solvent was removed with a rotary evaporator and the residue was purified by column chromatography on silica gel to afford the desired product **5aa** (105.0 mg, 81%). The product was dried under high vacuum for at least 0.5 h before it was weighed and characterized by NMR spectroscopy.

**Representative Procedures for the Synthesis of 7 (7aa as an Example):** An undivided cell was equipped with a magnet stirrer, two platinum plates (1.0 x 1.0 cm<sup>2</sup>) electrodes as the working electrode and counter electrode. In the electrolytic cell, a mixture of acetophenone **6a** (0.3 mmol, 3.0 mg, 1.0 equiv), 3-methyl-1-phenyl-1H-pyrazol-5-amine **2a** (0.60 mmol, 103.9 mg, 2.0 equiv.), NH<sub>4</sub>I (0.3 mmol, 43.5 mg, 1.0 equiv), DMF (3.0 mL) was allowed to stir and electrolyze at a constant current conditions (10 mA) at oil bath (130 °C). After the reaction was completed (15 h), 30 mL water was added and extracted with EtOAc 3 times (3×30 mL). The extract was dried over anhydrous Na<sub>2</sub>SO<sub>4</sub>. Then the solvent was removed with a rotary evaporator and the residue was purified by column chromatography on silica gel to afford the desired product **7aa** (110.0 mg, 83%). The product was dried under high vacuum for at least 0.5 h before it was weighed and characterized by NMR spectroscopy.

**Procedure for the Synthesis of 3aa:** An undivided cell was equipped with a magnet stirrer, two platinum plates (1.5 x 1.5 cm<sup>2</sup>) electrodes as the working electrode and counter electrode. In the electrolytic cell, a mixture of 2-methylquinoline **1a** (4 mmol, 573 mg, 1.0 equiv), 3-methyl-1-phenyl-1H-pyrazol-5-amine **2a** (8 mmol, 1386 mg, 2.0 equiv), NH<sub>4</sub>I (4 mmol, 579.8 mg, 1.0 equiv), DMF (40.0 mL) was allowed to stir and electrolyze at a constant current conditions (I = 23 mA, J = 10 mA/cm<sup>2</sup>) at oil bath (120 °C). After the reaction was completed (about 3.7 days), 30 mL water was added and extracted with EtOAc 3 times (3×200 mL). The extract was dried over anhydrous Na<sub>2</sub>SO<sub>4</sub>. Then the solvent was removed with a rotary evaporator and the residue was purified by column chromatography on silica gel to afford the desired product **3aa** (1350 mg, 76%).

**Photographic Depiction of the Electrolysis Setup (3aa as an Example):**

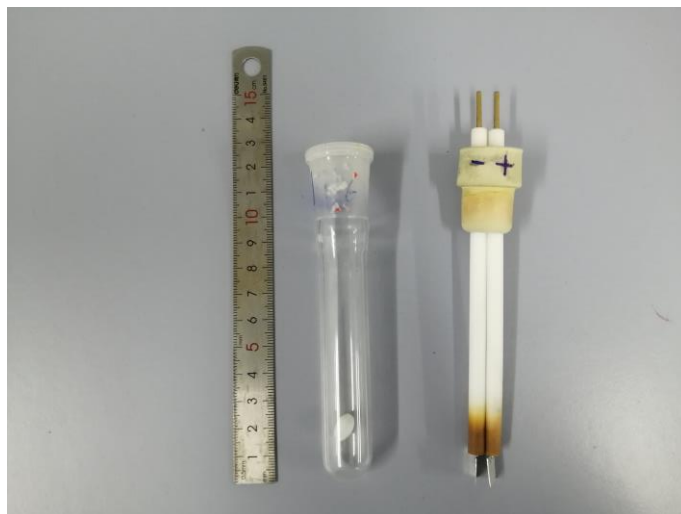

**Figure S1** Electrodes and electrolysis Cell

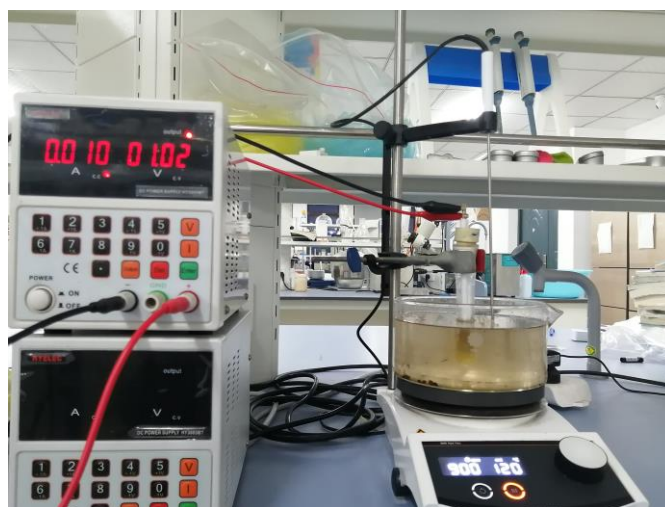

**Figure S2** Electrolysis setup

## Photoluminescence spectra of 3aa and 5aa

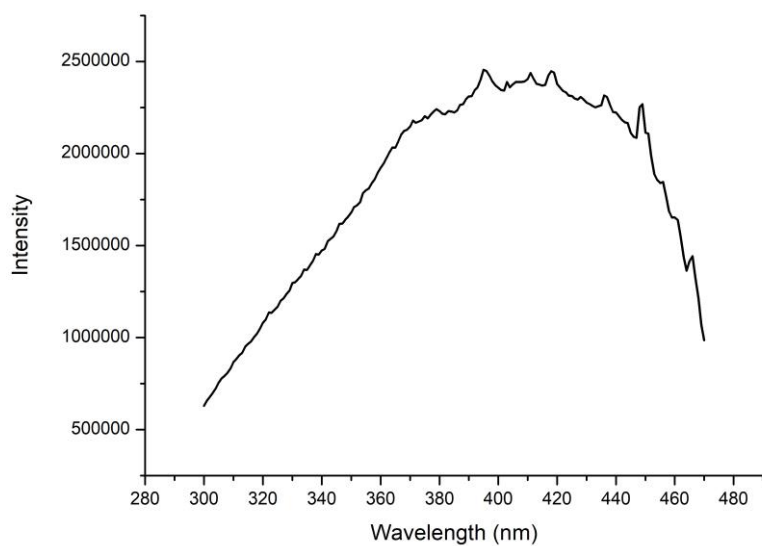

**Figure S3** Photoluminescence absorption spectrum of **3aa** in solid powders

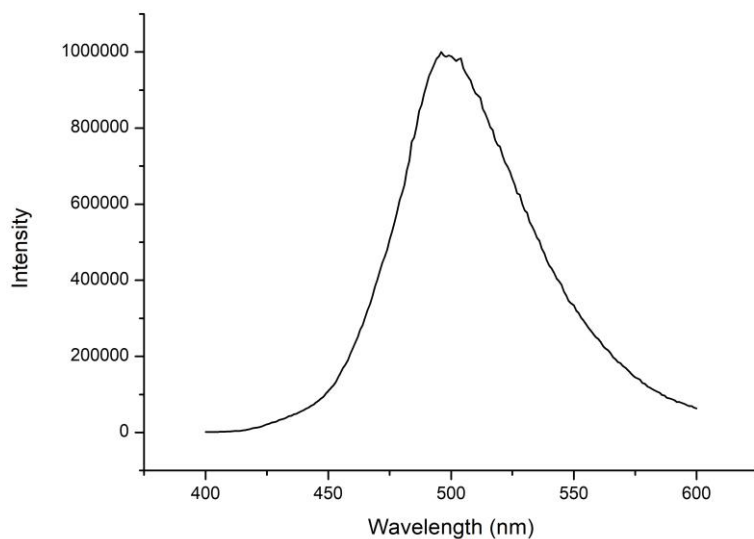

**Figure S4** Photoluminescence emission spectrum of **3aa** in solid powders upon excitation at 418 nm

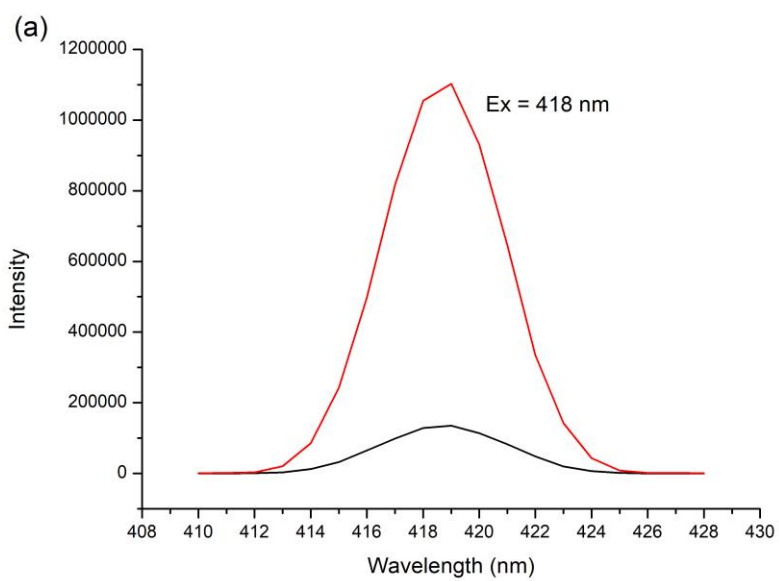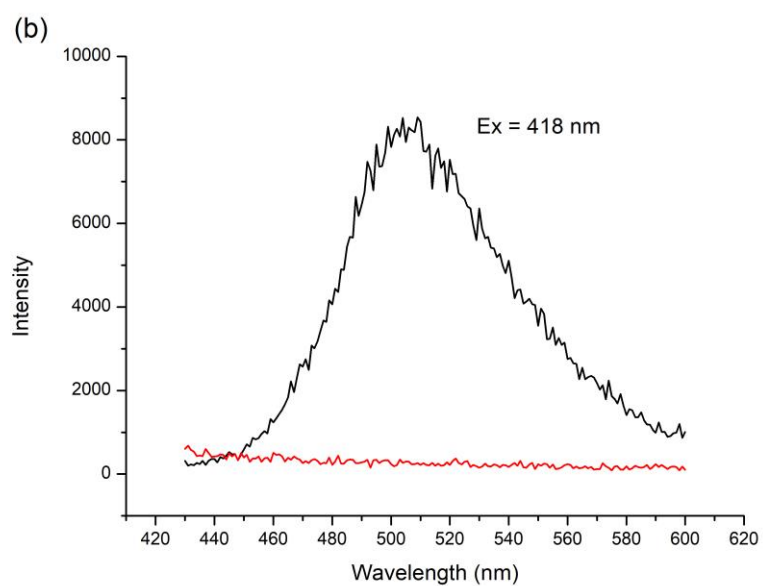

**Figure S5** Photoluminescence (PL) quantum yield of **3aa**.

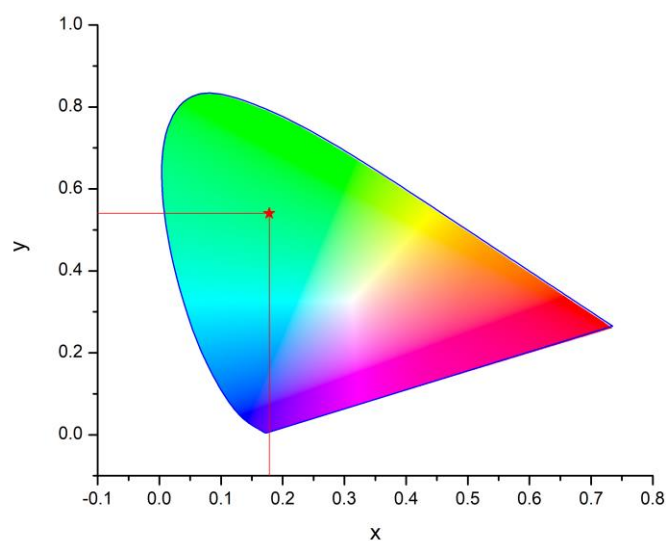

**Figure S6** Chromaticity output (CIE 1931) of **3aa** ( $x = 0.17817$ ,  $y = 0.54036$ ).

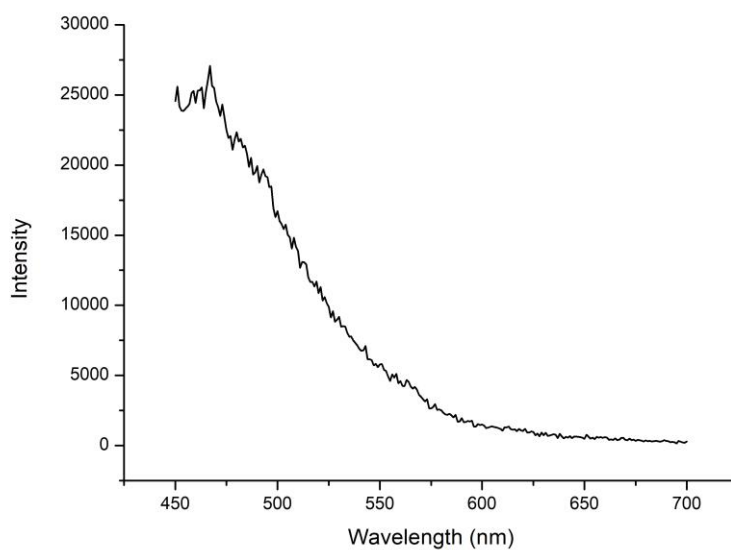

**Figure S7** Photoluminescence emission spectrum of **5aa** in solid powders

## Detail Descriptions for Products

### *3,5-Dimethyl-1,7-diphenyl-4-(quinolin-2-yl)-1,7-dihydrodipyrzolo[3,4-b:4',3'-e]pyridine (3aa)*

The title compound was prepared according to the general working procedure and purified by column chromatography (petroleum ether / ethyl acetate = 10:1,  $R_f = 0.23$ ) to give the product

as a green solid: 84% yield, (117 mg); m.p. 227-230 °C; <sup>1</sup>H NMR (CDCl<sub>3</sub>, 400 MHz, ppm): δ = 8.44 – 8.42 (m, 5H), 8.25 (d, *J* = 7.2 Hz, 1H), 8.03 (d, *J* = 6.8 Hz, 1H), 7.91 – 7.87 (m, 1H), 7.76 – 7.71 (m, 2H), 7.58 – 7.54 (m, 4H), 7.33 – 7.29 (m, 2H), 2.07 (s, 6H); <sup>13</sup>C NMR (CDCl<sub>3</sub>, 100 MHz, ppm): δ = 153.5, 150.8, 147.5, 144.0, 139.6, 139.2, 136.3, 130.8, 129.8, 129.0, 127.9, 127.8, 127.5, 125.2, 122.1, 120.4, 113.1, 15.0. These data are in accordance with the literature.<sup>1</sup>

*3,5-Dimethyl-4-(6-methylquinolin-2-yl)-1,7-diphenyl-1,7-dihydrodipyrzolo[3,4-b:4',3'-e]pyridine*  
**(3ba)**

The title compound was prepared according to the general working procedure and purified by column chromatography (petroleum ether / ethyl acetate = 10:1, *R<sub>f</sub>* = 0.25) to give the product as a brown solid: 74% yield, (107 mg); m.p. 212-214 °C; <sup>1</sup>H NMR (CDCl<sub>3</sub>, 400 MHz, ppm): δ = 8.44 – 8.42 (m, 4H), 8.33 (d, *J* = 7.6 Hz, 1H), 8.13 (d, *J* = 8.8 Hz, 1H), 7.78 (s, 1H), 7.73 – 7.70 (m, 1H), 7.67 (d, *J* = 8.4 Hz, 1H), 7.58 – 7.54 (m, 4H), 7.33 – 7.31 (m, 2H), 2.65 (s, 3H), 2.07 (s, 6H); <sup>13</sup>C NMR (CDCl<sub>3</sub>, 100 MHz, ppm): δ = 152.5, 150.8, 146.1, 144.1, 139.6, 139.4, 137.9, 136.0, 133.1, 129.4, 129.0, 127.5, 126.7, 125.2, 122.0, 120.4, 113.2, 21.7, 14.9. These data are in accordance with the literature.<sup>1</sup>

*4-(6-(tert-Butyl)quinolin-2-yl)-3,5-dimethyl-1,7-diphenyl-1,7-dihydrodipyrzolo[3,4-b:4',3'-e]pyridine*  
**(3ca)**

The title compound was prepared according to the general working procedure and purified by column chromatography (petroleum ether / ethyl acetate = 10:1, *R<sub>f</sub>* = 0.30) to give the product as a yellow solid: 88% yield, (138 mg); m.p. 223-226 °C; <sup>1</sup>H NMR (CDCl<sub>3</sub>, 400 MHz, ppm): δ = 8.45 – 8.42 (m, 4H), 8.38 (d, *J* = 7.6 Hz, 1H), 8.18 (d, *J* = 8.8 Hz, 1H), 7.98 (dd, *J* = 9.2 Hz, *J* = 2.4 Hz, 1H), 7.92 – 7.91 (m, 1H), 7.68 (d, *J* = 8.4 Hz, 1H), 7.58 – 7.54 (m, 4H), 7.33 – 7.29 (m, 2H), 2.08 (s, 6H), 1.52 (s, 9H); <sup>13</sup>C NMR (CDCl<sub>3</sub>, 100 MHz, ppm): δ = 152.7, 150.8, 150.8, 146.0, 144.1, 139.6, 139.4, 136.3, 129.8, 129.2, 129.0, 127.3, 125.2, 122.8, 122.0, 120.4, 113.2, 35.1, 31.2, 15.0. HRMS (ESI-TOF) *m/z*: [M + H]<sup>+</sup> Calcd for C<sub>34</sub>H<sub>31</sub>N<sub>6</sub> 523.2610; Found: 523.2608.

*4-(6-Methoxyquinolin-2-yl)-3,5-dimethyl-1,7-diphenyl-1,7-dihydrodipyrzolo[3,4-b:4',3'-e]pyridine*  
**(3da)**



The title compound was prepared according to the general working procedure and purified by column chromatography (petroleum ether / ethyl acetate = 10:1,  $R_f$  = 0.15) to give the product as a white solid: 40% yield, (60 mg); m.p. 262-264 °C;  $^1\text{H}$  NMR ( $\text{CDCl}_3$ , 400 MHz, ppm):  $\delta$  = 8.44 – 8.42 (m, 4H), 8.31 (d,  $J$  = 7.6 Hz, 1H), 8.13 (d,  $J$  = 8.8 Hz, 1H), 7.66 (d,  $J$  = 8.4 Hz, 1H), 7.58 – 7.52 (m, 5H), 7.33 – 7.29 (m, 2H), 7.27 – 7.26 (m, 1H), 4.03 (s, 3H), 2.08 (s, 6H);  $^{13}\text{C}$  NMR ( $\text{CDCl}_3$ , 100 MHz, ppm):  $\delta$  = 158.7, 150.8, 150.7, 144.1, 143.6, 139.6, 139.4, 134.9, 131.2, 129.0, 128.7, 125.2, 123.7, 122.3, 120.4, 113.2, 105.1, 55.7, 14.9. These data are in accordance with the literature.<sup>1</sup>

*4-(6-Fluoroquinolin-2-yl)-3,5-dimethyl-1,7-diphenyl-1,7-dihydrodipyrzolo[3,4-b:4',3'-e]pyridine*  
**(3ea)**

The title compound was prepared according to the general working procedure and purified by column chromatography (petroleum ether / ethyl acetate = 10:1,  $R_f$  = 0.24) to give the product as a green solid: 72% yield, (105 mg); m.p. 236-237 °C;  $^1\text{H}$  NMR ( $\text{CDCl}_3$ , 400 MHz, ppm):  $\delta$  = 8.43 – 8.41 (m, 4H), 8.37 (d,  $J$  = 8.4 Hz, 1H), 8.27 – 8.23 (m, 1H), 7.73 (d,  $J$  = 8.4 Hz, 1H), 7.68 – 7.63 (m, 2H), 7.58 – 7.54 (m, 4H), 7.33 – 7.30 (m, 2H), 2.06 (s, 6H);  $^{13}\text{C}$  NMR ( $\text{CDCl}_3$ , 100 MHz, ppm):  $\delta$  = 161.1 (d,  $J$  = 248.9 Hz), 152.8 (d,  $J$  = 2.8 Hz), 150.8, 144.6, 143.9, 139.6, 138.8, 135.7 (d,  $J$  = 5.5 Hz), 132.4 (d,  $J$  = 9.3 Hz), 129.0, 128.2 (d,  $J$  = 10.2 Hz), 125.3, 122.8, 121.2 (d,  $J$  = 25.6 Hz), 120.4, 113.0, 110.9 (d,  $J$  = 21.7 Hz), 14.9;  $^{19}\text{F}$  NMR ( $\text{CDCl}_3$ , 376 MHz, ppm):  $\delta$  = -111.0. These data are in accordance with the literature.<sup>1</sup>

*4-(6-Chloroquinolin-2-yl)-3,5-dimethyl-1,7-diphenyl-1,7-dihydrodipyrzolo[3,4-b:4',3'-e]pyridine*  
**(3fa)**

The title compound was prepared according to the general working procedure and purified by column chromatography (petroleum ether / ethyl acetate = 10:1,  $R_f$  = 0.27) to give the product as a yellow solid: 83% yield, (124 mg); m.p. 226-229 °C;  $^1\text{H}$  NMR ( $\text{CDCl}_3$ , 400 MHz, ppm):  $\delta$  = 8.43 – 8.41 (m, 4H), 8.34 (d,  $J$  = 8.0 Hz, 1H), 8.18 (d,  $J$  = 8.8 Hz, 1H), 8.02 – 8.01 (m, 1H), 7.82 (dd,  $J$  = 9.2 Hz,  $J$  = 2.4 Hz, 1H), 7.74 (d,  $J$  = 8.4 Hz, 1H), 7.58 – 7.54 (m, 4H), 7.34 – 7.29 (m, 2H), 2.06 (s, 6H);  $^{13}\text{C}$  NMR ( $\text{CDCl}_3$ , 100 MHz, ppm):  $\delta$  = 153.8, 150.8, 145.8, 143.8, 139.6, 138.6, 135.4, 133.7, 131.8, 131.4, 129.0, 128.0, 126.6, 125.3, 123.0, 120.4, 113.0, 14.9. These data are in accordance with the literature.<sup>1</sup>

*4-(6-Bromoquinolin-2-yl)-3,5-dimethyl-1,7-diphenyl-1,7-dihydrodipyrzolo[3,4-b:4',3'-e]pyridine*  
**(3ga)**

The title compound was prepared according to the general working procedure and purified by column chromatography (petroleum ether / ethyl acetate = 10:1,  $R_f$  = 0.30) to give the product as a yellow solid: 71% yield, (116 mg); m.p. 213-216 °C;  $^1\text{H}$  NMR ( $\text{CDCl}_3$ , 400 MHz, ppm):  $\delta$  = 8.43 – 8.40 (m, 4H), 8.32 (d,  $J$  = 8.0 Hz, 1H), 8.19 (d,  $J$  = 2.4 Hz, 1H), 8.11 (d,  $J$  = 9.2 Hz, 1H), 7.95 (d,  $J$  = 8.8 Hz,  $J$  = 2.4 Hz, 1H), 7.73 (d,  $J$  = 8.4 Hz, 1H), 7.58 – 7.53 (m, 4H), 7.34 – 7.29 (m, 2H), 2.05 (s, 6H);  $^{13}\text{C}$  NMR ( $\text{CDCl}_3$ , 100 MHz, ppm):  $\delta$  = 153.9, 150.7, 146.0, 143.8, 139.5, 138.6, 135.3, 134.3, 131.4, 129.9, 129.0, 128.5, 125.3, 123.0, 121.9, 120.4, 112.9, 14.9. These data are in accordance with the literature.<sup>1</sup>

*4-(7-Chloroquinolin-2-yl)-3,5-dimethyl-1,7-diphenyl-1,7-dihydrodipyrzolo[3,4-b:4',3'-e]pyridine*  
**(3ha)**

The title compound was prepared according to the general working procedure and purified by column chromatography (petroleum ether / ethyl acetate = 10:1,  $R_f$  = 0.22) to give the product as a yellow solid: 63% yield, (94 mg); m.p. 227-229 °C;  $^1\text{H}$  NMR ( $\text{CDCl}_3$ , 400 MHz, ppm):  $\delta$  = 8.43 – 8.40 (m, 5H), 8.24 (d,  $J$  = 2.0 Hz, 1H), 7.97 (d,  $J$  = 8.8 Hz, 1H), 7.72 – 7.68 (m, 2H), 7.58 – 7.54 (m, 4H), 7.34 – 7.30 (m, 2H), 2.07 (s, 6H);  $^{13}\text{C}$  NMR ( $\text{CDCl}_3$ , 100 MHz, ppm):  $\delta$  = 154.7, 150.8, 147.8, 143.8, 139.6, 138.6, 136.8, 136.2, 129.1, 129.0, 129.0, 128.8, 125.8, 125.3, 122.3, 120.5, 113.0, 14.9. HRMS (ESI-TOF)  $m/z$ :  $[\text{M} + \text{H}]^+$  Calcd for  $\text{C}_{30}\text{H}_{22}\text{ClN}_6$  501.1594; Found: 501.1586.

*3,5-Dimethyl-1,7-diphenyl-4-(6-(trifluoromethyl)quinolin-2-yl)-1,7-dihydrodipyrzolo[3,4-b:4',3'-e]pyridine*  
**(3ia)**

The title compound was prepared according to the general working procedure and purified by column chromatography (petroleum ether / ethyl acetate = 10:1,  $R_f$  = 0.32) to give the product as a yellow solid: 74% yield, (119 mg); m.p. 269-271 °C;  $^1\text{H}$  NMR ( $\text{CDCl}_3$ , 400 MHz, ppm):  $\delta$  = 8.51 (d,  $J$  = 8.4 Hz, 1H), 8.43 – 8.35 (m, 6H), 8.06 (d,  $J$  = 6.8 Hz, 1H), 7.83 (d,  $J$  = 8.4 Hz, 1H), 7.58 – 7.54 (m, 4H), 7.34 – 7.30 (m, 2H), 2.04 (s, 6H);  $^{13}\text{C}$  NMR ( $\text{CDCl}_3$ , 100 MHz, ppm):  $\delta$  = 155.9, 150.7, 148.3, 143.6, 139.5, 138.2, 137.1, 131.0, 129.7 (q,  $J$  = 32.6 Hz), 129.0, 126.5, 126.4, 125.9 (q,  $J$  = 4.4 Hz),

125.3, 123.8 (q,  $J = 270.8$  Hz), 123.4, 120.4, 112.9, 14.9;  $^{19}\text{F}$  NMR ( $\text{CDCl}_3$ , 376 MHz, ppm):  $\delta = -62.4$ . HRMS (ESI-TOF)  $m/z$ :  $[\text{M} + \text{H}]^+$  Calcd for  $\text{C}_{31}\text{H}_{22}\text{F}_3\text{N}_6$  535.1858; Found: 535.1858.

*3,5-Dimethyl-4-(8-methylquinolin-2-yl)-1,7-diphenyl-1,7-dihydrodipyrazolo[3,4-b:4',3'-e]pyridine*  
**(3ja)**

The title compound was prepared according to the general working procedure and purified by column chromatography (petroleum ether / ethyl acetate = 10:1,  $R_f = 0.50$ ) to give the product as a yellow solid: 69% yield, (100 mg); m.p. 236-238 °C;  $^1\text{H}$  NMR ( $\text{CDCl}_3$ , 400 MHz, ppm):  $\delta = 8.45$  (d,  $J = 7.6$  Hz, 4H), 8.35 (d,  $J = 8.4$  Hz, 1H), 7.85 (d,  $J = 6.4$  Hz, 1H), 7.72 (d,  $J = 6.8$  Hz, 1H), 7.68 (d,  $J = 8.4$  Hz, 1H), 7.62 – 7.55 (m, 5H), 7.34 – 7.30 (m, 2H), 2.85 (s, 3H), 2.09 (s, 6H);  $^{13}\text{C}$  NMR ( $\text{CDCl}_3$ , 100 MHz, ppm):  $\delta = 152.1, 150.8, 146.6, 144.2, 140.0, 139.6, 137.9, 136.3, 130.6, 128.9, 127.5, 127.4, 125.8, 125.1, 122.1, 120.3, 113.1, 18.1, 15.1$ . HRMS (ESI-TOF)  $m/z$ :  $[\text{M} + \text{H}]^+$  Calcd for  $\text{C}_{31}\text{H}_{25}\text{N}_6$  481.2141; Found: 481.2136.

*3,5-Dimethyl-4-(1,8-naphthyridin-2-yl)-1,7-diphenyl-1,7-dihydrodipyrazolo[3,4-b:4',3'-e]pyridine*  
**(3ka)**

The title compound was prepared according to the general working procedure and purified by column chromatography (petroleum ether / ethyl acetate = 1:1,  $R_f = 0.16$ ) to give the product as a brown solid: 77% yield, (108 mg); m.p. 269-272 °C;  $^1\text{H}$  NMR ( $\text{CDCl}_3$ , 400 MHz, ppm):  $\delta = 9.29$  (s, 1H), 8.44 – 8.41 (m, 6H), 7.80 (d,  $J = 6.8$  Hz, 1H), 7.70 – 7.66 (m, 1H), 7.57 – 7.53 (m, 4H), 7.32 – 7.26 (m, 2H), 2.07 (s, 6H);  $^{13}\text{C}$  NMR ( $\text{CDCl}_3$ , 100 MHz, ppm):  $\delta = 157.0, 155.3, 155.0, 150.7, 143.9, 139.6, 138.4, 137.4, 137.2, 129.0, 125.2, 123.4, 123.2, 122.1, 120.4, 112.8, 15.0$ . HRMS (ESI-TOF)  $m/z$ :  $[\text{M} + \text{H}]^+$  Calcd for  $\text{C}_{29}\text{H}_{22}\text{N}_7$  468.1931; Found: 468.1922.

*4-(Isoquinolin-1-yl)-3,5-dimethyl-1,7-diphenyl-1,7-dihydrodipyrazolo[3,4-b:4',3'-e]pyridine* **(3la)**

The title compound was prepared according to the general working procedure and purified by column chromatography (petroleum ether / ethyl acetate = 10:1,  $R_f = 0.15$ ) to give the product as a yellow solid: 75% yield, (105 mg); m.p. 185-190 °C;  $^1\text{H}$  NMR ( $\text{CDCl}_3$ , 400 MHz, ppm):  $\delta = 8.80$  (d,  $J = 5.6$  Hz, 1H), 8.47 – 8.44 (m, 4H), 8.03 (d,  $J = 8.0$  Hz, 1H), 7.92 (d,  $J = 5.6$  Hz, 1H), 7.81 – 7.77 (m,

1H), 7.60 – 7.53 (m, 6H), 7.35 – 7.30 (m, 2H), 1.80 (s, 6H); <sup>13</sup>C NMR (CDCl<sub>3</sub>, 100 MHz, ppm): δ = 154.3, 150.8, 144.1, 142.1, 139.6, 137.3, 135.8, 131.0, 129.0, 128.4, 128.0, 127.2, 126.4, 125.3, 121.6, 120.4, 113.8, 14.0. HRMS (ESI-TOF) m/z: [M + H]<sup>+</sup> Calcd for C<sub>30</sub>H<sub>23</sub>N<sub>6</sub> 467.1979; Found: 467.1981.

*2-(3,5-Dimethyl-1,7-diphenyl-1,7-dihydrodipyrzolo[3,4-b:4',3'-e]pyridin-4-yl)benzo[d]thiazole*  
**(3ma)**

The title compound was prepared according to the general working procedure and purified by column chromatography (petroleum ether / ethyl acetate = 10:1, R<sub>f</sub> = 0.48) to give the product as a green solid: 32% yield, (45 mg); m.p. 213-216 °C; <sup>1</sup>H NMR (CDCl<sub>3</sub>, 400 MHz, ppm): δ = 8.43 – 8.40 (m, 4H), 8.28 (d, J = 7.6 Hz, 1H), 8.08 (d, J = 9.2 Hz, 1H), 7.71 – 7.66 (m, 1H), 7.62 – 7.54 (m, 5H), 7.34 – 7.30 (m, 2H), 2.26 (s, 6H); <sup>13</sup>C NMR (CDCl<sub>3</sub>, 100 MHz, ppm): δ = 159.6, 152.9, 150.3, 143.6, 139.4, 135.8, 131.1, 129.0, 127.0, 126.4, 125.4, 124.2, 121.7, 120.4, 113.3, 14.6. These data are in accordance with the literature.<sup>1</sup>

*1,3,5,7-Tetramethyl-4-(quinolin-2-yl)-1,7-dihydrodipyrzolo[3,4-b:4',3'-e]pyridine* **(3ab)**

The title compound was prepared according to the general working procedure and purified by column chromatography (petroleum ether / ethyl acetate = 3:1, R<sub>f</sub> = 0.26) to give the product as a yellow oil: 54% yield, (55 mg); <sup>1</sup>H NMR (CDCl<sub>3</sub>, 400 MHz, ppm): δ = 8.37 (d, J = 7.6 Hz, 1H), 8.21 (d, J = 7.6 Hz, 1H), 7.99 (d, J = 6.8 Hz, 1H), 7.87 – 7.83 (m, 1H), 7.71 – 7.67 (m, 1H), 7.62 (d, J = 8.0 Hz, 1H), 4.10 (s, 6H), 1.99 (s, 6H); <sup>13</sup>C NMR (CDCl<sub>3</sub>, 100 MHz, ppm): δ = 154.0, 152.2, 147.4, 141.7, 138.7, 136.1, 130.6, 129.7, 127.8, 127.5, 127.4, 122.1, 111.1, 33.5, 14.8. These data are in accordance with the literature.<sup>1</sup>

*1,3,7,9-Tetramethyl-5-(quinolin-2-yl)pyrido[2,3-d:6,5-d']dipyrimidine-2,4,6,8(1H,3H,7H,9H)-tetraone* **(5aa)**

The title compound was prepared according to the general working procedure and purified by column chromatography (petroleum ether / ethyl acetate = 1:1, R<sub>f</sub> = 0.15) to give the product as a white solid: 81% yield, (105 mg); m.p. >300 °C; <sup>1</sup>H NMR (CDCl<sub>3</sub>, 400 MHz, ppm): δ = 8.29 (d, J =

8.0 Hz, 1H), 8.02 (d,  $J = 8.4$  Hz, 1H), 7.93 (d,  $J = 6.8$  Hz, 1H), 7.73 – 7.69 (m, 1H), 7.60 – 7.56 (m, 1H), 7.43 (d,  $J = 8.8$  Hz, 1H), 3.81 (s, 6H), 3.27 (s, 6H);  $^{13}\text{C}$  NMR ( $\text{CDCl}_3$ , 100 MHz, ppm):  $\delta = 159.0$ , 157.0, 156.7, 153.5, 150.7, 147.5, 135.1, 129.5, 129.0, 128.1, 127.1, 126.4, 120.1, 105.1, 30.4, 28.4. These data are in accordance with the literature.<sup>1</sup>

*1,3,7,9-Tetramethyl-5-(6-methylquinolin-2-yl)pyrido[2,3-d:6,5-d']dipyrimidine-2,4,6,8(1H,3H,7H,9H)-tetraone (5ba)*

The title compound was prepared according to the general working procedure and purified by column chromatography (petroleum ether / ethyl acetate = 1:1,  $R_f = 0.16$ ) to give the product as a brown solid: 83% yield, (110 mg); m.p.  $>300$  °C;  $^1\text{H}$  NMR ( $\text{CDCl}_3$ , 400 MHz, ppm):  $\delta = 8.20$  (d,  $J = 7.6$  Hz, 1H), 7.91 (d,  $J = 8.4$  Hz, 1H), 7.69 – 7.68 (m, 1H), 7.54 (d,  $J = 8.4$  Hz,  $J = 2.0$  Hz, 1H), 7.39 (d,  $J = 8.4$  Hz, 1H), 3.80 (s, 6H), 3.26 (s, 6H), 2.56 (s, 3H);  $^{13}\text{C}$  NMR ( $\text{CDCl}_3$ , 100 MHz, ppm):  $\delta = 159.1$ , 157.2, 155.8, 153.6, 150.9, 146.2, 136.4, 134.6, 131.8, 128.7, 127.3, 127.1, 120.2, 105.2, 30.4, 28.5, 21.6. These data are in accordance with the literature.<sup>1</sup>

*5-(6-Methoxyquinolin-2-yl)-1,3,7,9-tetramethylpyrido[2,3-d:6,5-d']dipyrimidine-2,4,6,8(1H,3H,7H,9H)-tetraone (5da)*

The title compound was prepared according to the general working procedure and purified by column chromatography (petroleum ether / ethyl acetate = 1:1,  $R_f = 0.16$ ) to give the product as a white solid: 76% yield, (105 mg); m.p.  $>300$  °C;  $^1\text{H}$  NMR ( $\text{CDCl}_3$ , 400 MHz, ppm):  $\delta = 8.18$  (d,  $J = 8.0$  Hz, 1H), 7.91 (d,  $J = 9.2$  Hz, 1H), 7.39 – 7.34 (m, 2H), 7.20 – 7.19 (m, 1H), 3.95 (s, 3H), 3.79 (s, 6H), 3.26 (s, 6H);  $^{13}\text{C}$  NMR ( $\text{CDCl}_3$ , 100 MHz, ppm):  $\delta = 159.1$ , 157.8, 157.3, 154.1, 153.6, 150.9, 143.6, 134.1, 130.4, 128.2, 122.1, 120.4, 106.0, 105.2, 55.6, 30.4, 28.5. These data are in accordance with the literature.<sup>1</sup>

*5-(6-Bromoquinolin-2-yl)-1,3,7,9-tetramethylpyrido[2,3-d:6,5-d']dipyrimidine-2,4,6,8(1H,3H,7H,9H)-tetraone (5ga)*

The title compound was prepared according to the general working procedure and purified by column chromatography (petroleum ether / ethyl acetate = 1:1,  $R_f = 0.17$ ) to give the product as

a white solid: 60% yield, (92 mg); m.p. >300 °C; <sup>1</sup>H NMR (CDCl<sub>3</sub>, 400 MHz, ppm): δ = 8.19 (d, *J* = 8.0 Hz, 1H), 8.09 – 8.08 (m, 1H), 7.88 (d, *J* = 8.8 Hz, 1H), 7.79 – 7.76 (m, 1H), 7.44 (d, *J* = 8.4 Hz, 1H), 3.80 (s, 6H), 3.26 (s, 6H); <sup>13</sup>C NMR (CDCl<sub>3</sub>, 100 MHz, ppm): δ = 159.2, 157.4, 156.5, 153.7, 150.8, 146.1, 134.2, 133.1, 130.8, 130.2, 128.4, 121.2, 120.4, 105.1, 30.5, 28.6. These data are in accordance with the literature.<sup>1</sup>

*(3,5-Dimethyl-1,7-diphenyl-1,7-dihydrodipyrzolo[3,4-b:4',3'-e]pyridin-4-yl)(phenyl)methanone*  
**(7aa)**

The title compound was prepared according to the general working procedure and purified by column chromatography (petroleum ether / ethyl acetate = 20:1, *R<sub>f</sub>* = 0.25) to give the product as a yellow solid: 83% yield, (110 mg); m.p. 212-213 °C; <sup>1</sup>H NMR (CDCl<sub>3</sub>, 400 MHz, ppm): δ = 8.42 – 8.39 (m, 5H), 7.74 – 7.69 (m, 1H), 7.59 – 7.54 (m, 7H), 7.35 – 7.31 (m, 2H), 2.32 (s, 6H); <sup>13</sup>C NMR (CDCl<sub>3</sub>, 100 MHz, ppm): δ = 193.9, 150.6, 143.3, 139.4, 136.9, 136.5, 135.1, 129.3, 129.0, 125.5, 120.4, 111.4, 14.3. These data are in accordance with the literature.<sup>2</sup>

*(3,5-Dimethyl-1,7-diphenyl-1,7-dihydrodipyrzolo[3,4-b:4',3'-e]pyridin-4-yl)(p-tolyl)methanone*  
**(7ba)**

The title compound was prepared according to the general working procedure and purified by column chromatography (petroleum ether / ethyl acetate = 20:1, *R<sub>f</sub>* = 0.28) to give the product as a yellow solid: 62% yield, (85 mg); m.p. 230-232 °C; <sup>1</sup>H NMR (CDCl<sub>3</sub>, 400 MHz, ppm): δ = 8.42 – 8.40 (m, 5H), 7.58 – 7.54 (m, 5H), 7.35 – 7.30 (m, 4H), 2.48 (s, 3H), 2.32 (s, 6H); <sup>13</sup>C NMR (CDCl<sub>3</sub>, 100 MHz, ppm): δ = 193.4, 150.6, 146.5, 143.4, 139.4, 137.2, 134.2, 130.0, 129.0, 125.4, 120.4, 111.4, 21.9, 14.3. These data are in accordance with the literature.<sup>2</sup>

*(3,5-Dimethyl-1,7-diphenyl-1,7-dihydrodipyrzolo[3,4-b:4',3'-e]pyridin-4-yl)(4-methoxyphenyl)methanone*  
**(7ca)**

The title compound was prepared according to the general working procedure and purified by column chromatography (petroleum ether / ethyl acetate = 30:1, *R<sub>f</sub>* = 0.22) to give the product as a yellow solid: 74% yield, (105 mg); m.p. 203-205 °C; <sup>1</sup>H NMR (CDCl<sub>3</sub>, 400 MHz, ppm): δ = 8.42 –

8.40 (m, 5H), 7.58 – 7.54 (m, 6H), 7.34 – 7.30 (m, 3H), 3.90 (s, 3H), 2.34 (s, 6H); <sup>13</sup>C NMR (CDCl<sub>3</sub>, 100 MHz, ppm): δ = 192.0, 165.0, 150.6, 143.4, 139.4, 137.3, 129.7, 129.0, 125.4, 120.3, 111.3, 55.7, 14.2. These data are in accordance with the literature.<sup>2</sup>

*(3,5-Dimethyl-1,7-diphenyl-1,7-dihydrodipyrzolo[3,4-b:4',3'-e]pyridin-4-yl)(o-tolyl)methanone*  
**(7da)**

The title compound was prepared according to the general working procedure and purified by column chromatography (petroleum ether / ethyl acetate = 30:1, R<sub>f</sub> = 0.25) to give the product as a yellow solid: 55% yield, (75 mg); m.p. 221-224 °C; <sup>1</sup>H NMR (CDCl<sub>3</sub>, 400 MHz, ppm): δ = 8.41 – 8.39 (m, 4H), 7.58 – 7.54 (m, 5H), 7.47 (d, J = 7.6 Hz, 1H), 7.39 (d, J = 7.6 Hz, 1H), 7.34 – 7.30 (m, 2H), 7.22 – 7.18 (m, 1H), 2.91 (s, 3H), 2.32 (s, 6H); <sup>13</sup>C NMR (CDCl<sub>3</sub>, 100 MHz, ppm): δ = 195.3, 150.7, 143.4, 141.2, 139.4, 138.5, 134.9, 134.2, 134.1, 132.9, 129.0, 126.3, 125.4, 120.4, 111.3, 22.5, 14.3. HRMS (ESI-TOF) m/z: [M + H]<sup>+</sup> Calcd for C<sub>29</sub>H<sub>24</sub>N<sub>5</sub>O 458.1981; Found: 458.1968.

*(4-Chlorophenyl)(3,5-dimethyl-1,7-diphenyl-1,7-dihydrodipyrzolo[3,4-b:4',3'-e]pyridin-4-yl)methanone*  
**(7ea)**

The title compound was prepared according to the general working procedure and purified by column chromatography (petroleum ether / ethyl acetate = 30:1, R<sub>f</sub> = 0.21) to give the product as a yellow solid: 50% yield, (72 mg); m.p. 219-222 °C; <sup>1</sup>H NMR (CDCl<sub>3</sub>, 400 MHz, ppm): δ = 8.41 – 8.38 (m, 5H), 7.58 – 7.54 (m, 6H), 7.35 – 7.31 (m, 3H), 2.32 (s, 6H); <sup>13</sup>C NMR (CDCl<sub>3</sub>, 100 MHz, ppm): δ = 192.6, 150.5, 143.0, 141.9, 139.3, 136.0, 134.8, 129.8, 129.0, 125.5, 120.4, 111.2, 14.3. These data are in accordance with the literature.<sup>2</sup>

*(3-Methyl-1,7-diphenyl-1,7-dihydrodipyrzolo[3,4-b:4',3'-e]pyridin-4-yl)(thiophen-2-yl)methanone*  
**(7fa)**

The title compound was prepared according to the general working procedure and purified by column chromatography (petroleum ether / ethyl acetate = 30:1, R<sub>f</sub> = 0.23) to give the product as a yellow solid: 59% yield, (80 mg); m.p. 207-209 °C; <sup>1</sup>H NMR (CDCl<sub>3</sub>, 400 MHz, ppm): δ = 8.41 – 8.38 (m, 4H), 7.95 – 7.93 (m, 1H), 7.59 – 7.55 (m, 4H), 7.35 – 7.31 (m, 3H), 7.18 – 7.16 (m, 1H),

2.41 (s, 6H);  $^{13}\text{C}$  NMR ( $\text{CDCl}_3$ , 100 MHz, ppm):  $\delta$  = 185.4, 150.6, 143.8, 143.2, 139.4, 137.3, 135.9, 129.0, 125.5, 120.4, 111.2, 14.2. These data are in accordance with the literature.<sup>2</sup>

**Reference:**

1. R.-J. Xie, J.-H. Liu, Q.-Y. Zhang, Y.-J. Yang, L.-Q. Song, T.-Q. Shao, K.-X. Liu, Y. P. Zhu, *Org. Chem. Front.*, 2021, **8**, 2274.
2. Q. H. Gao, S. He, X. Wu, J. J. Zhang, S. P. Bai, Y. D. Wu, A. X. Wu, *Org. Chem. Front.*, 2018, **5**, 765.



### 3aa-<sup>1</sup>H NMR

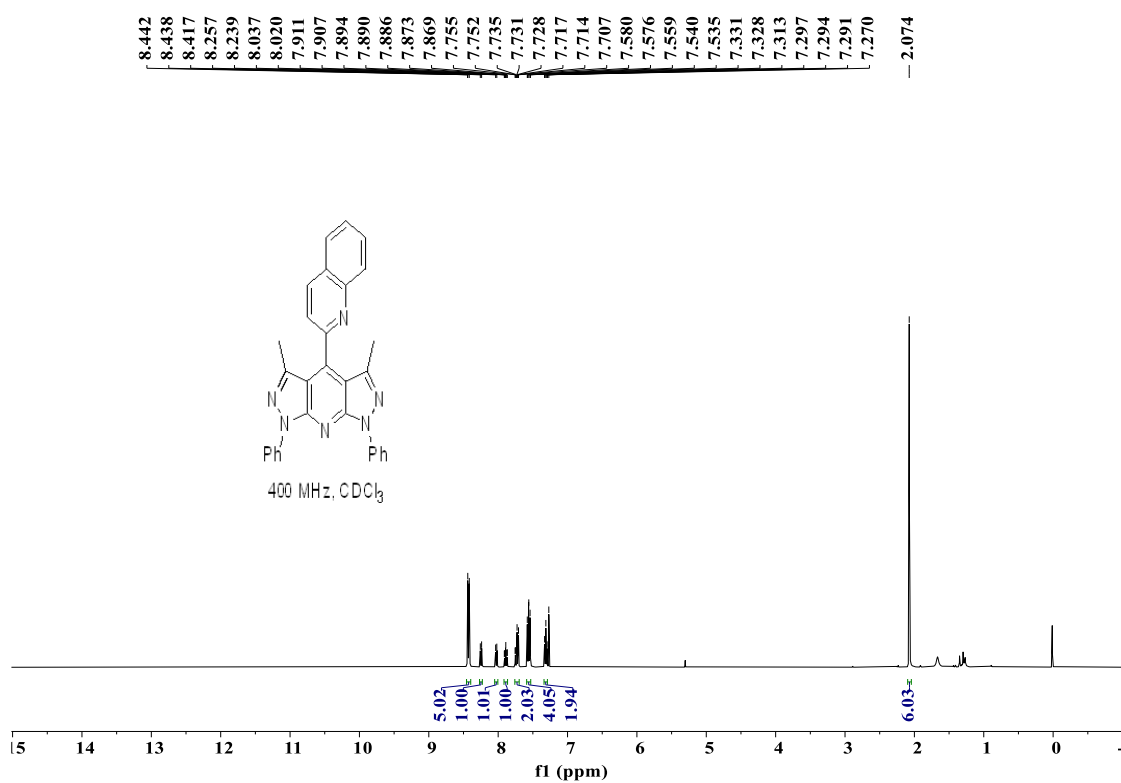

### 3aa-<sup>13</sup>C NMR

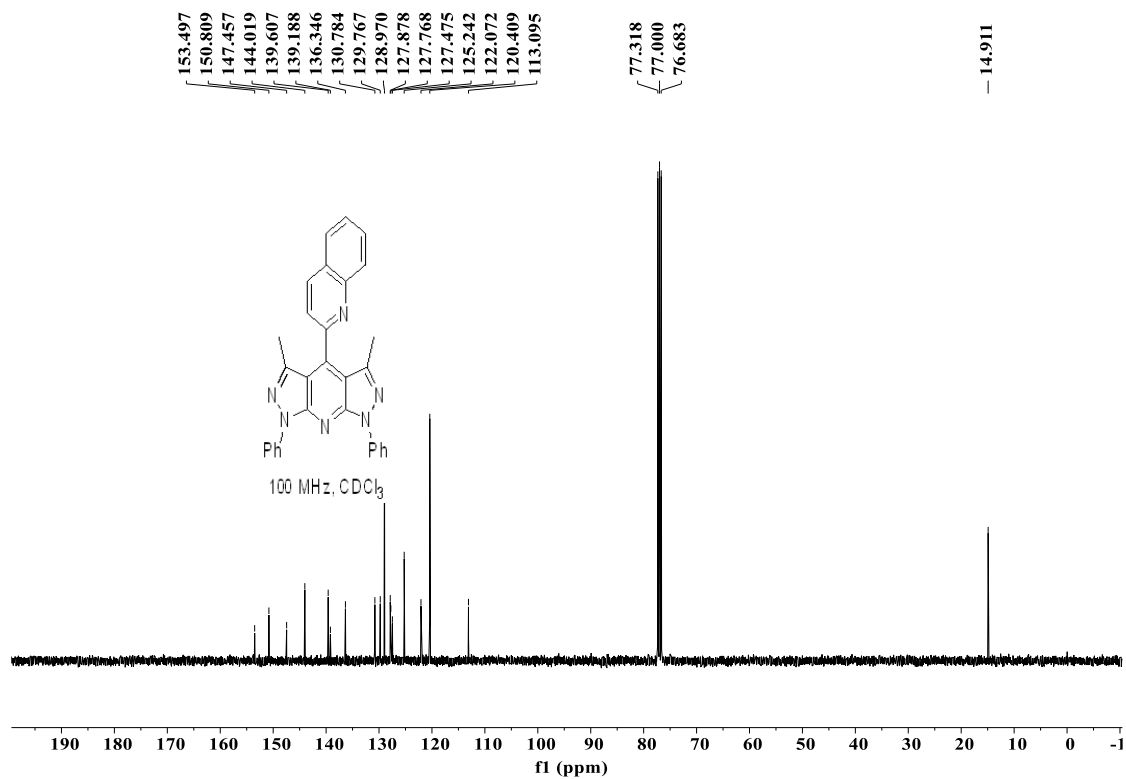

**3ba-<sup>1</sup>H NMR**

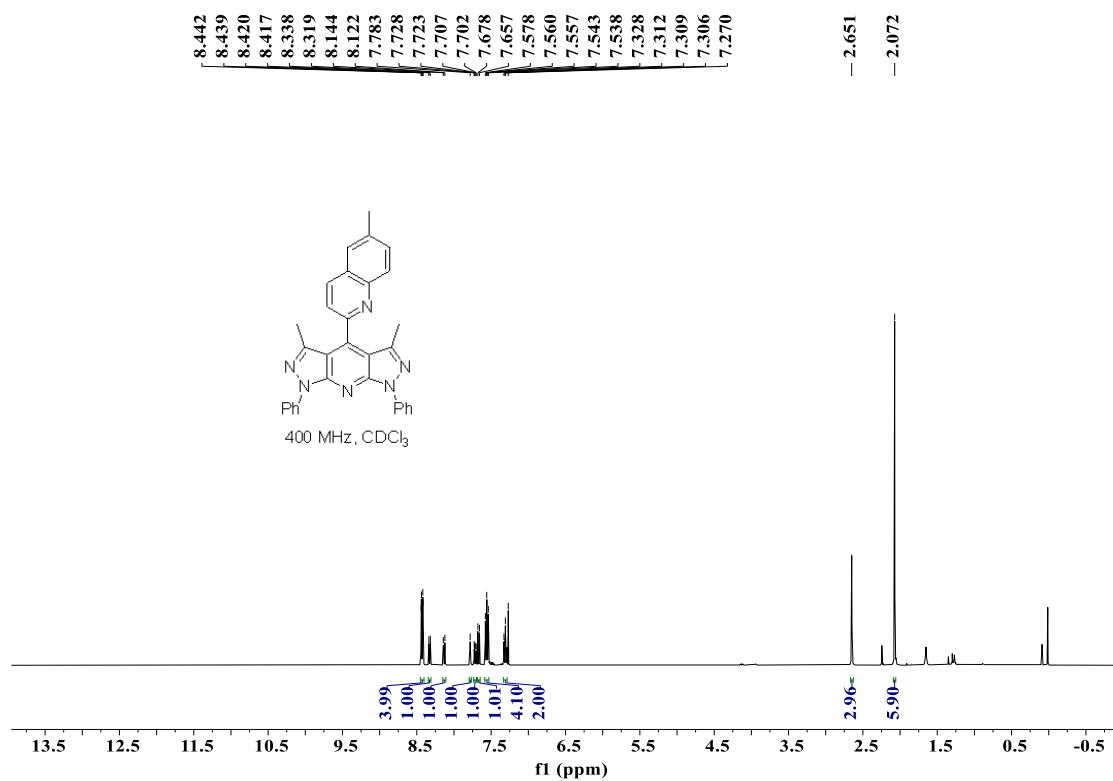

**3ba-<sup>13</sup>C NMR**

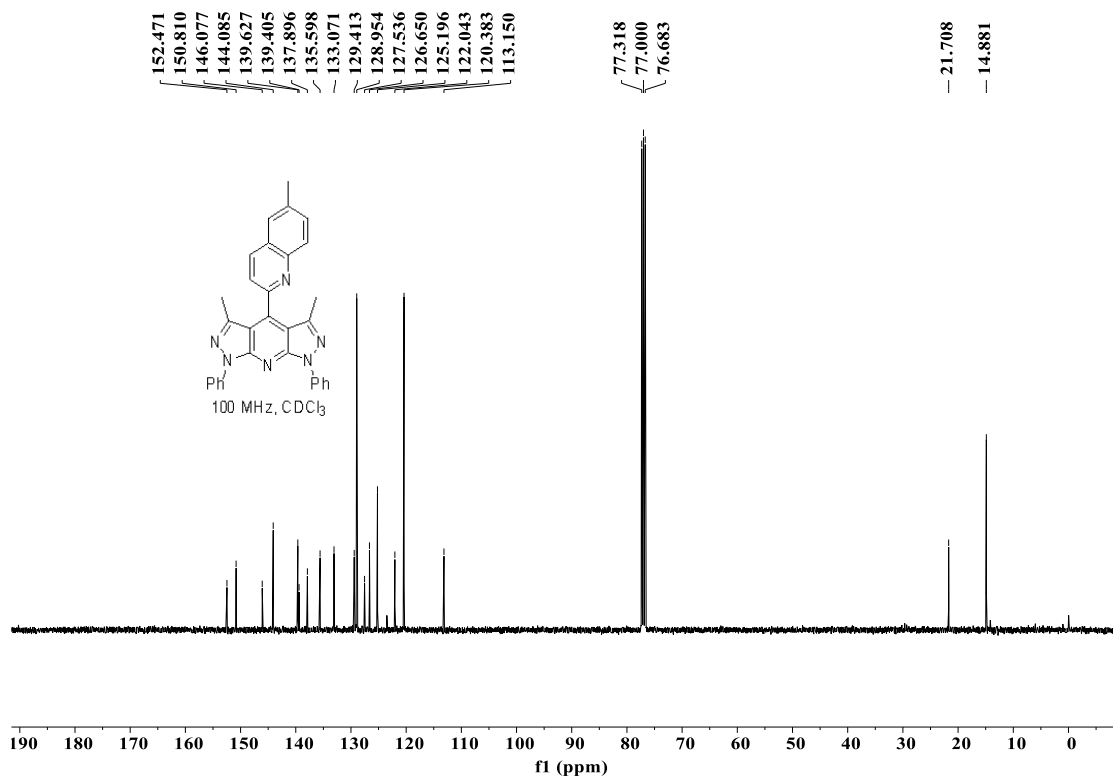

### 3ca-<sup>1</sup>H NMR

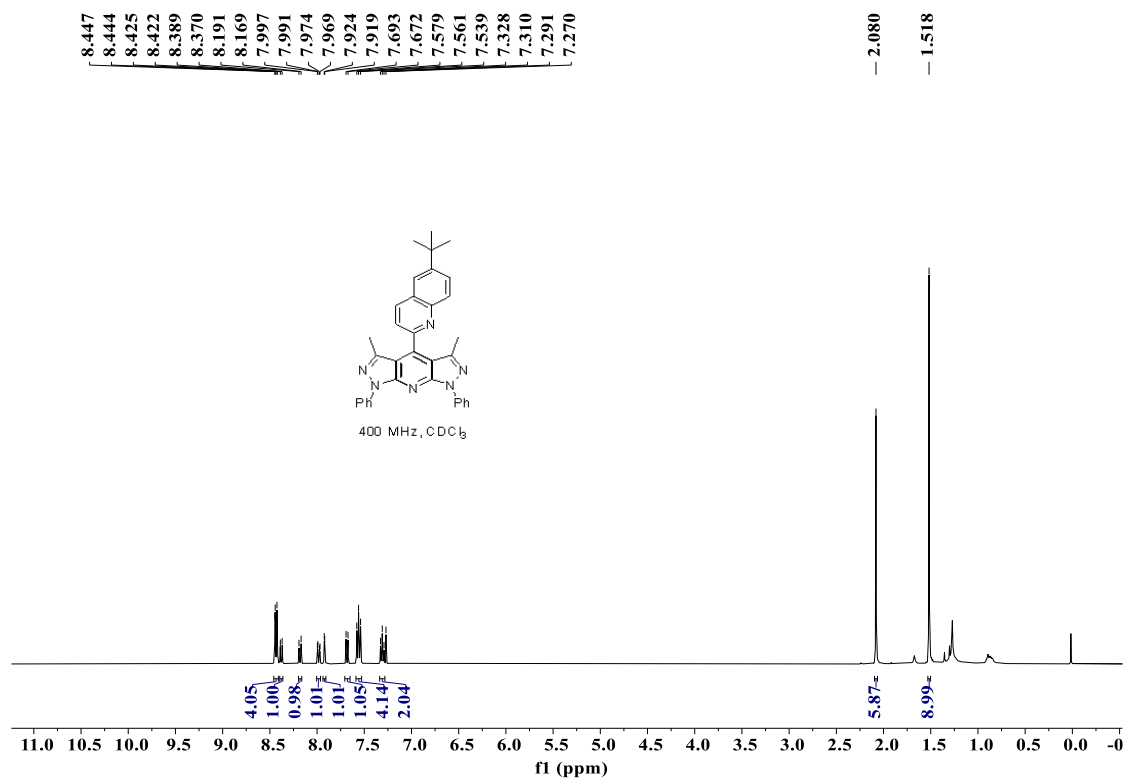

### 3ca-<sup>13</sup>C NMR

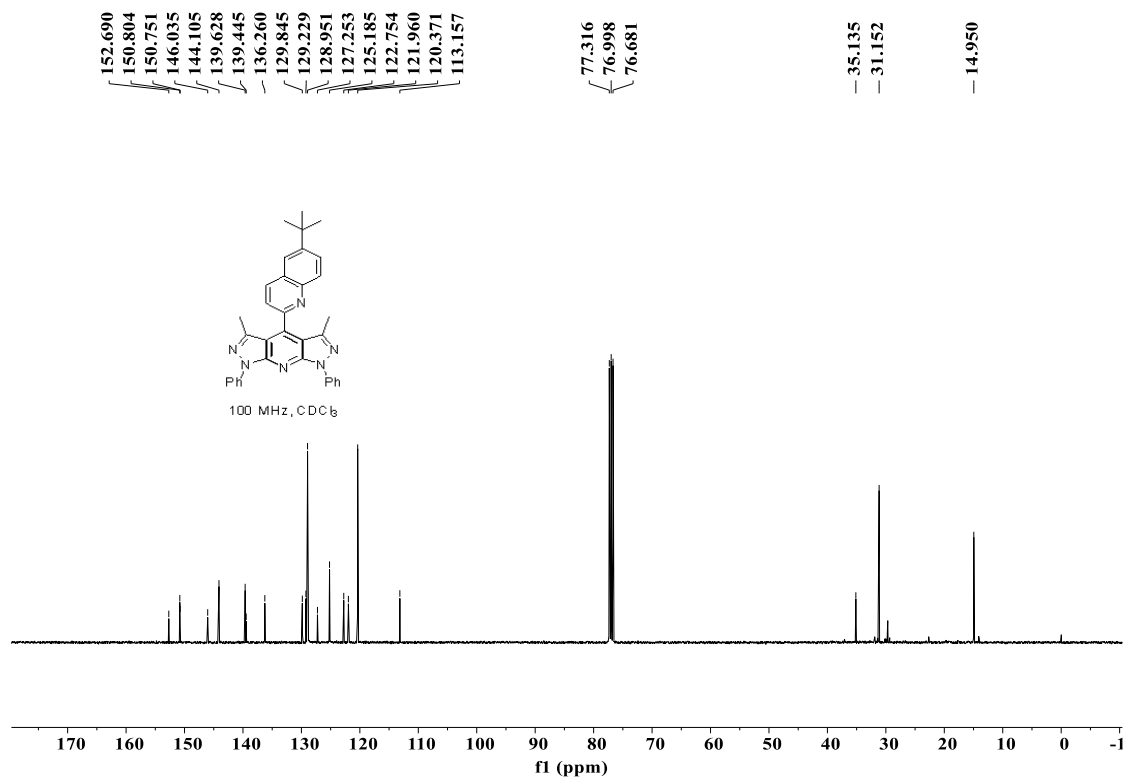

### 3da-<sup>1</sup>H NMR

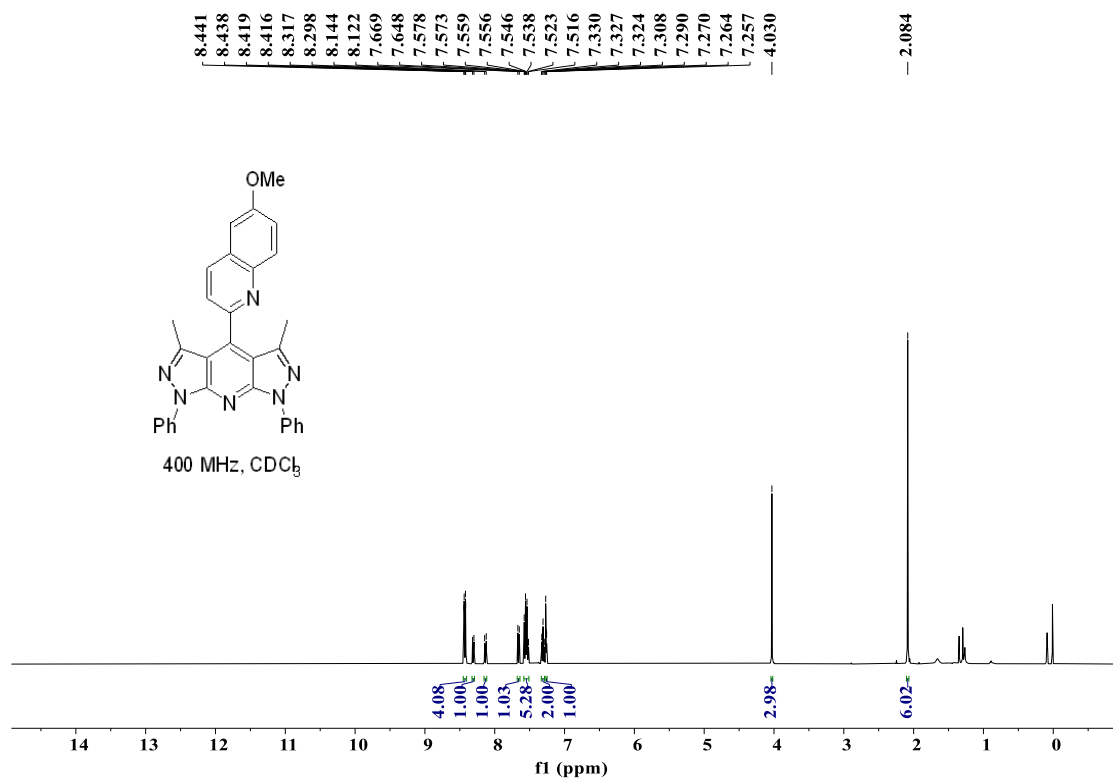

### 3da-<sup>13</sup>C NMR

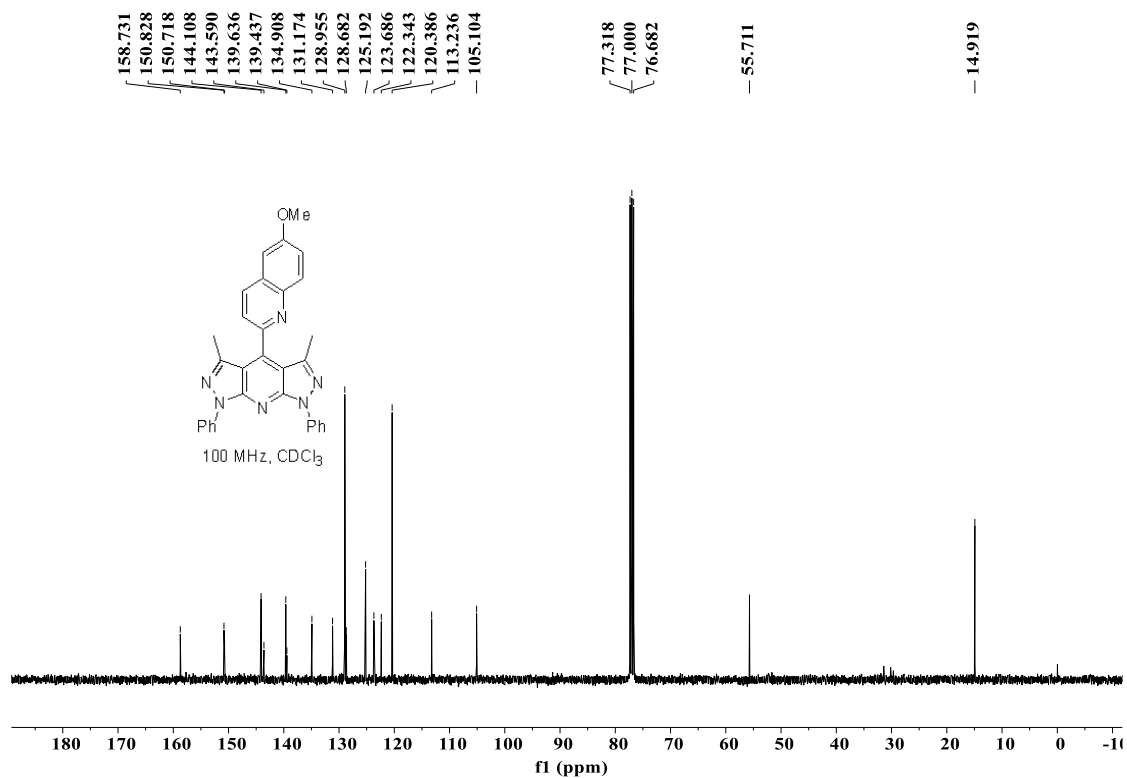

**3ea-<sup>1</sup>H NMR**

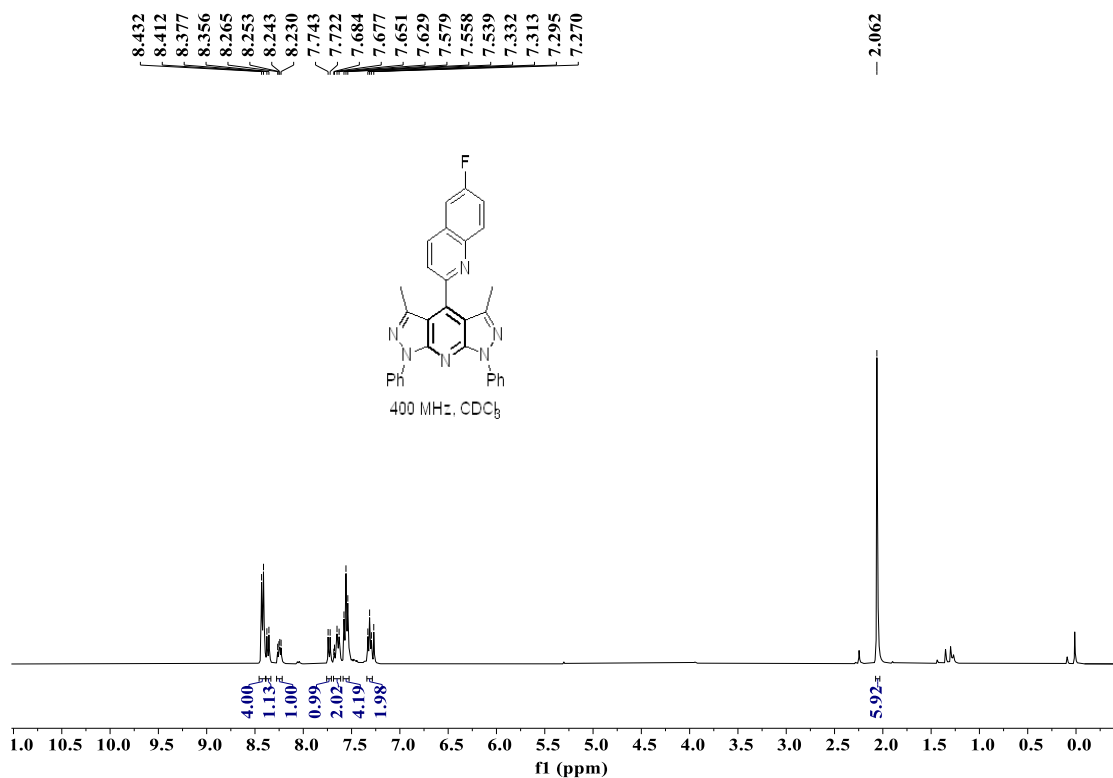

**3ea-<sup>13</sup>C NMR**

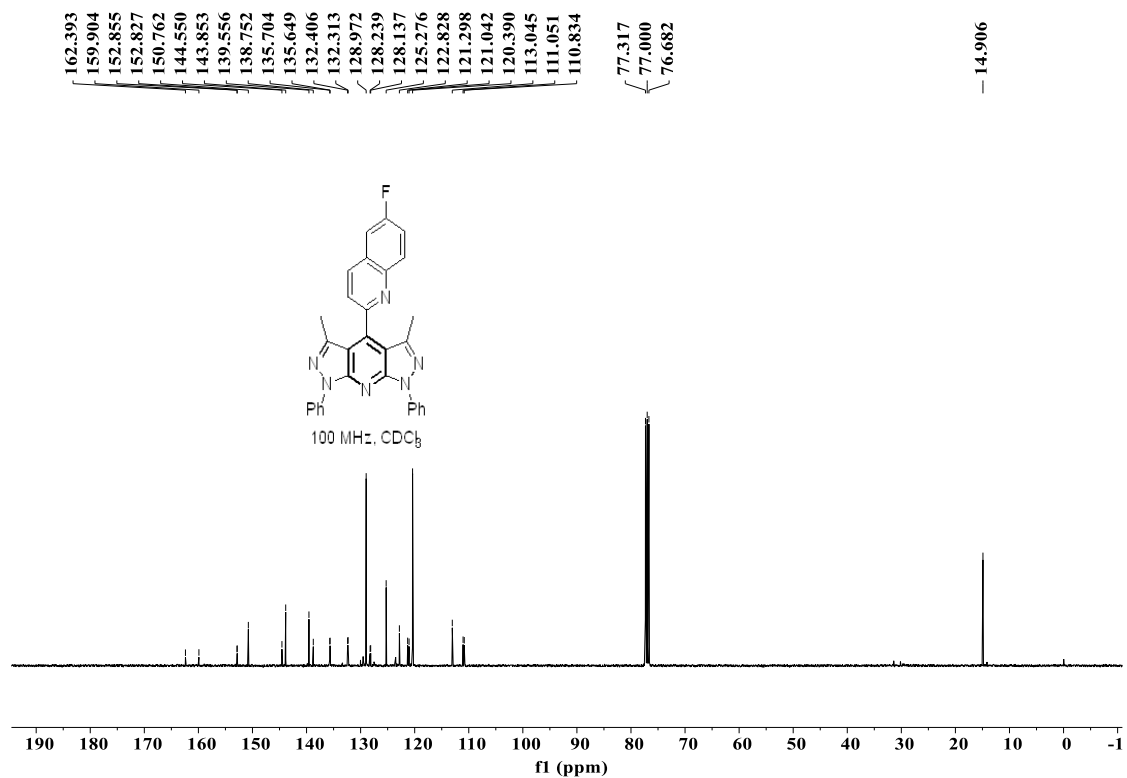

### 3ea -<sup>19</sup>F NMR

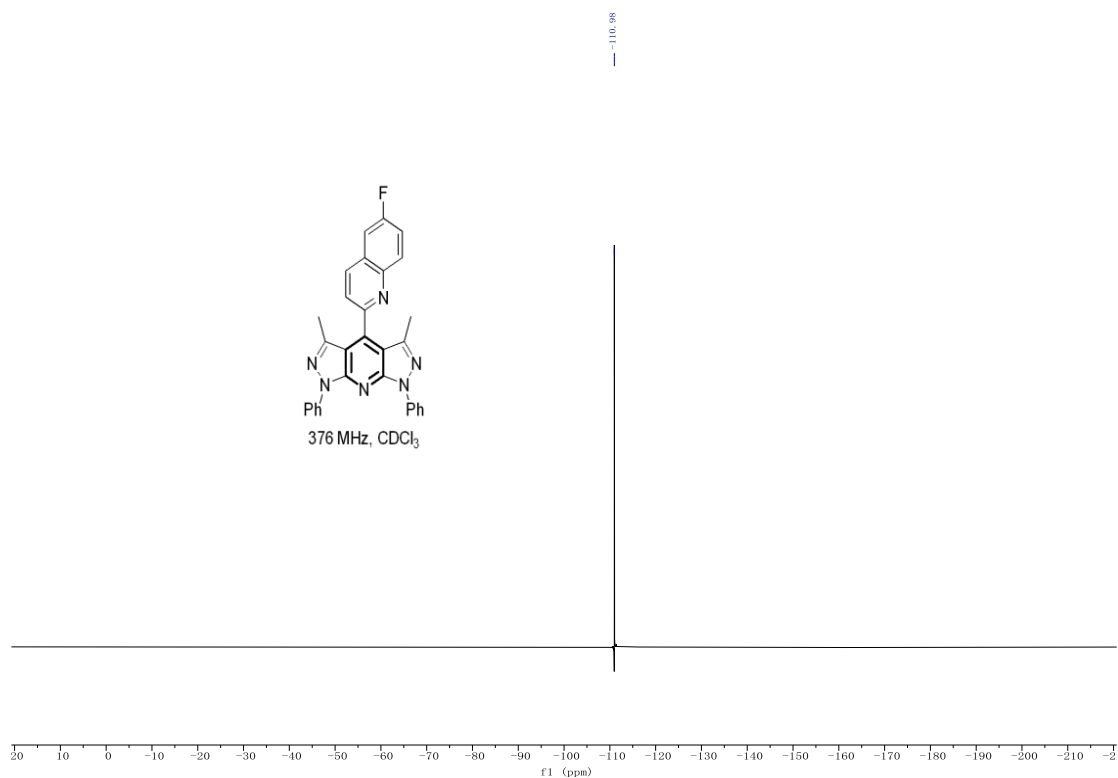

### 3fa-<sup>1</sup>H NMR

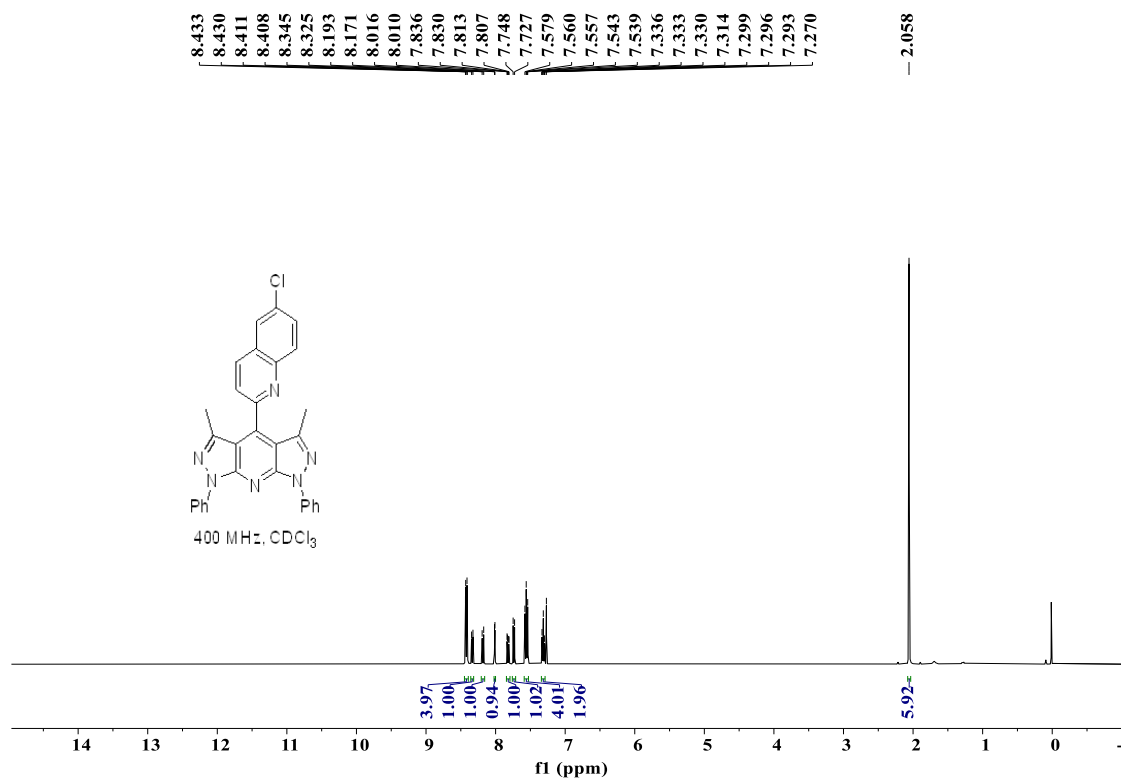

**3fa** <sup>13</sup>C NMR

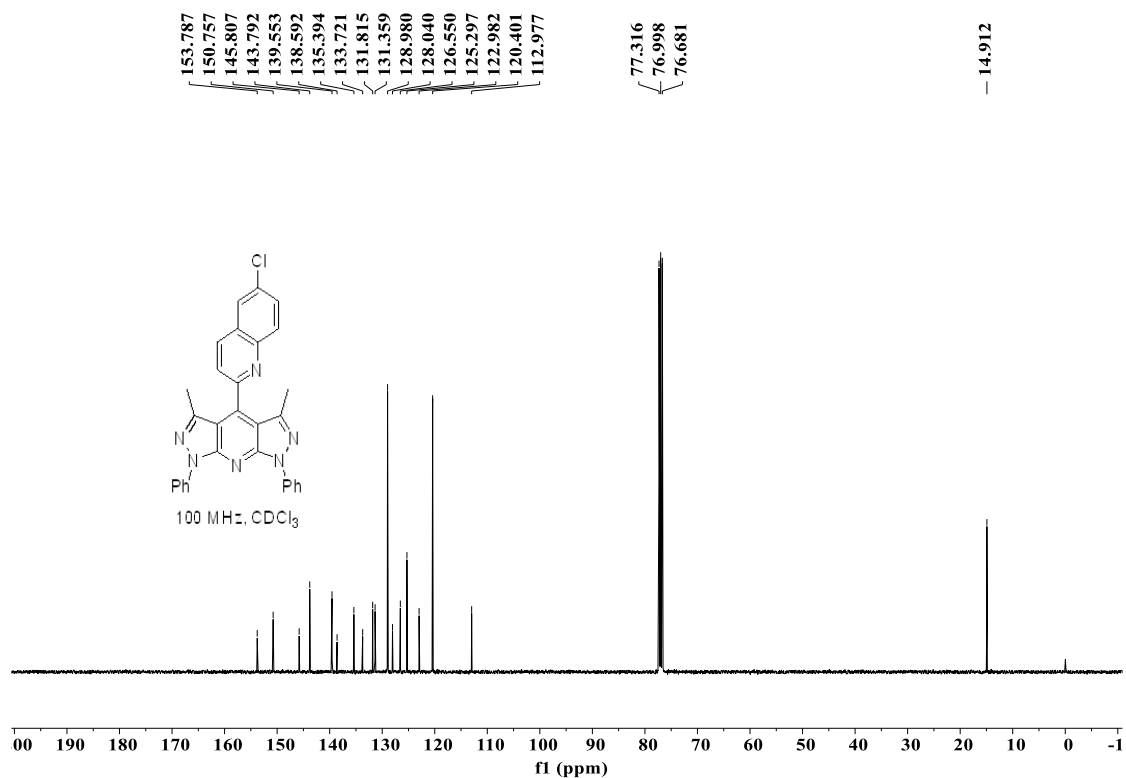

**3ga** <sup>1</sup>H NMR

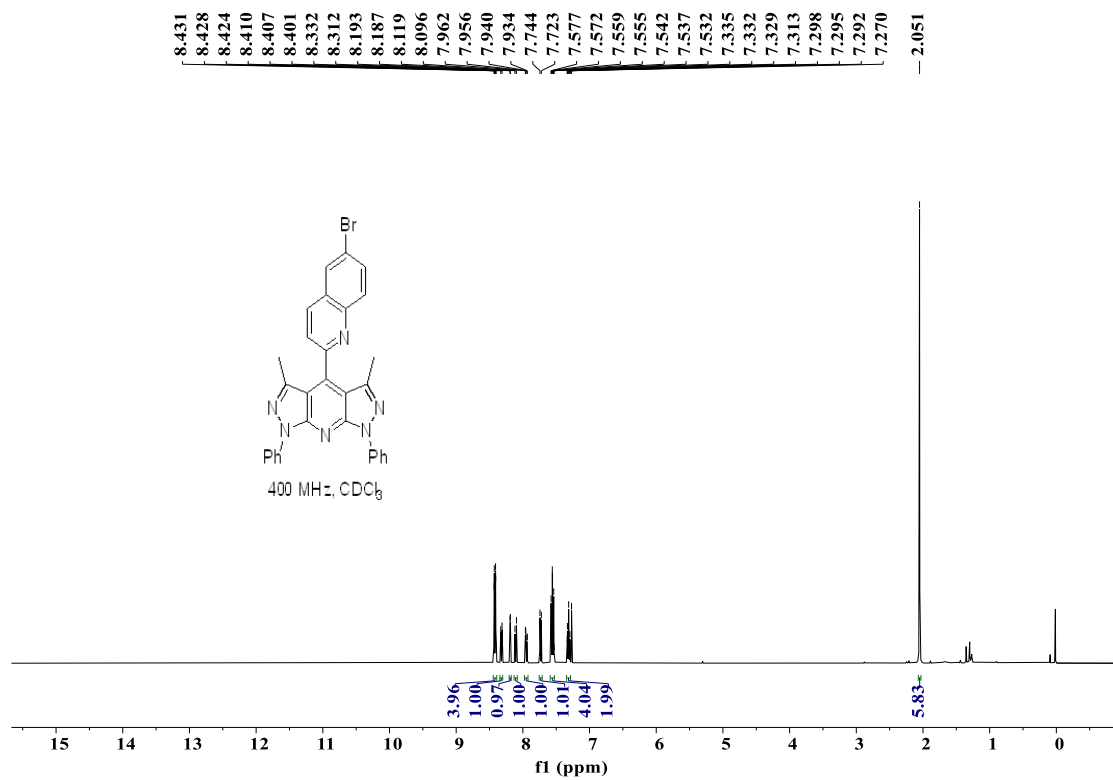

**3ga** -<sup>13</sup>C NMR

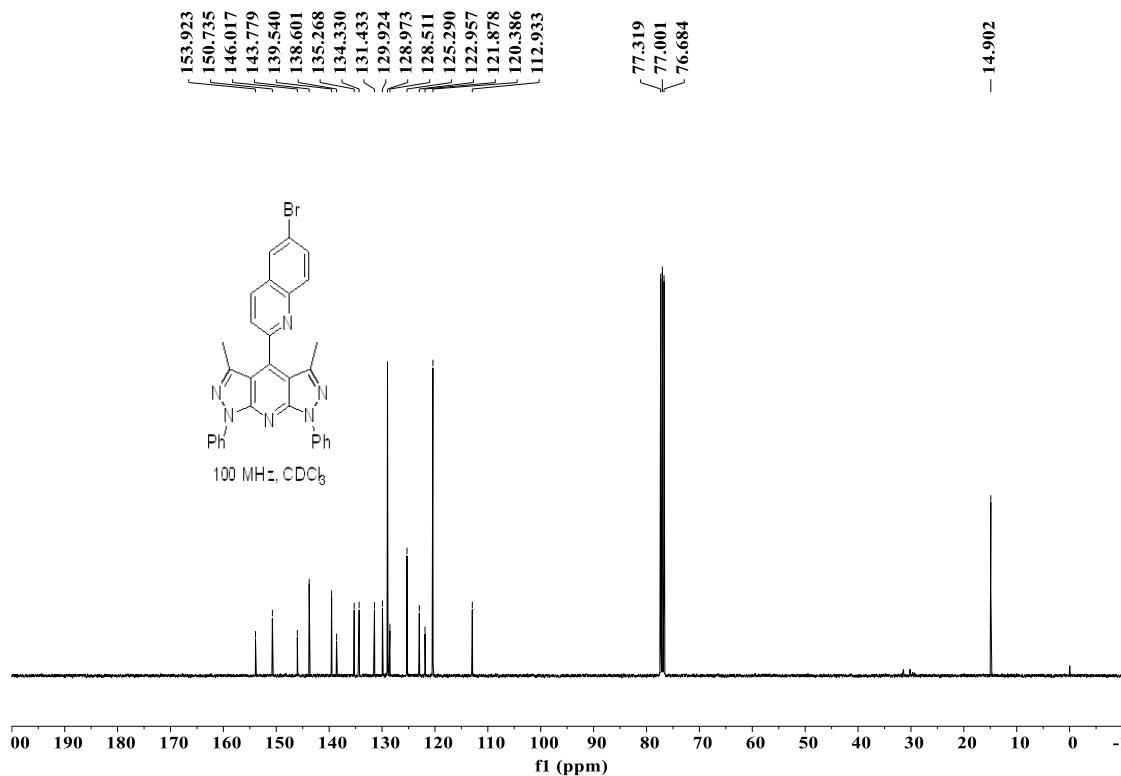

**3ha** -<sup>1</sup>H NMR

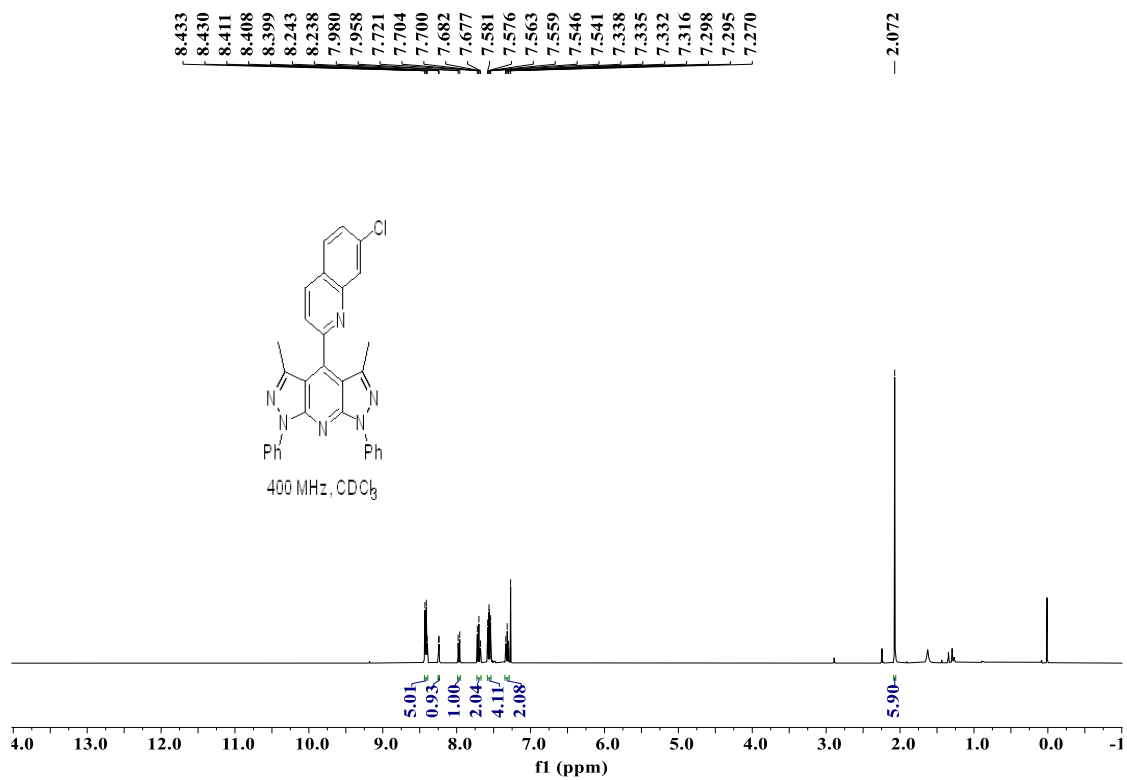



3ha <sup>13</sup>C NMR

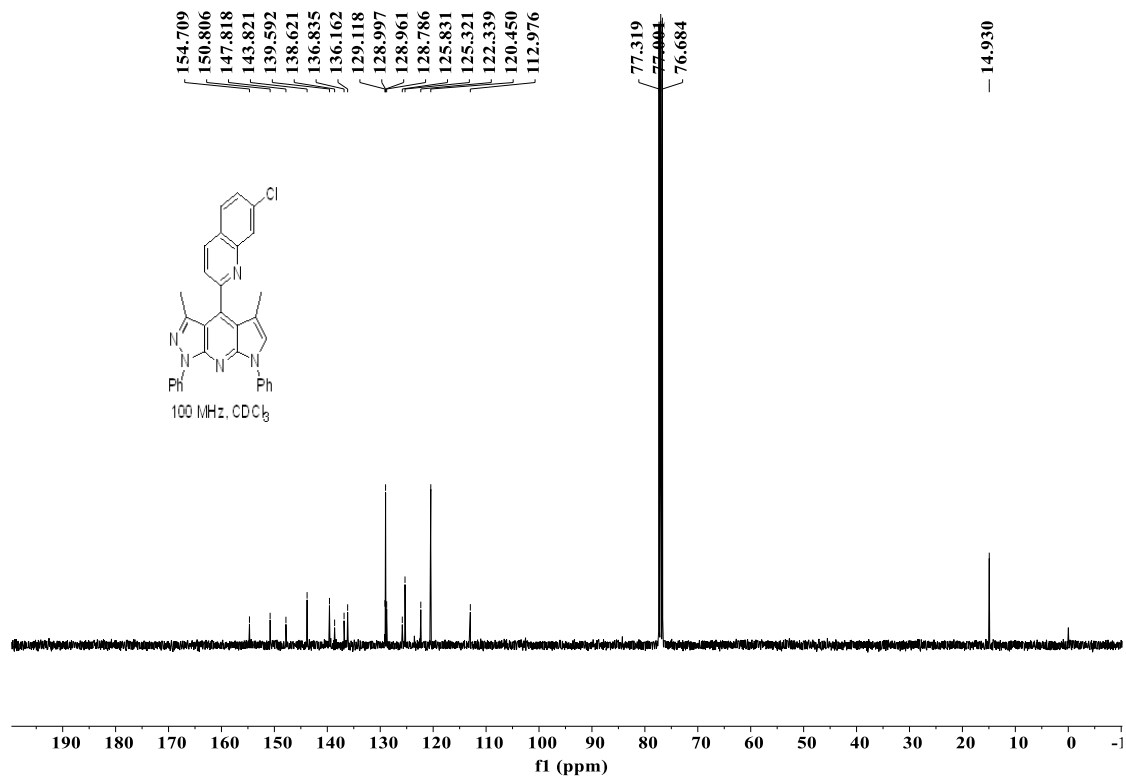

3ia <sup>1</sup>H NMR

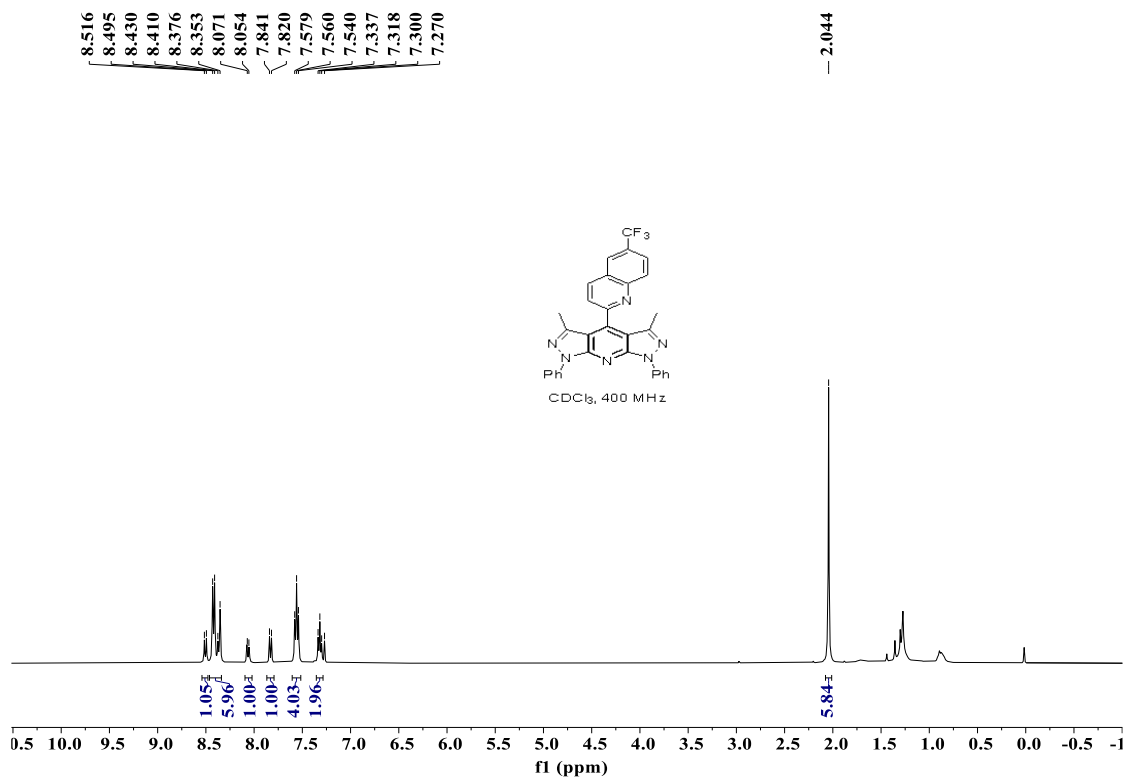

### 3ia -<sup>13</sup>C NMR

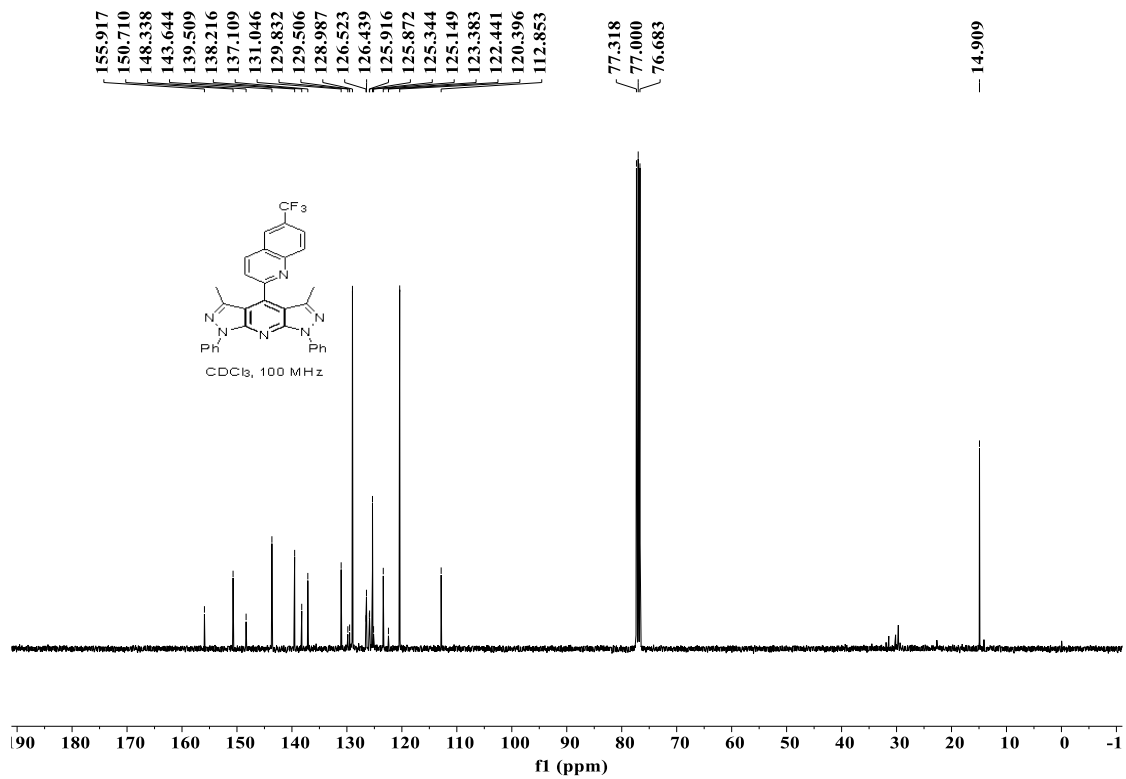

### 3ia -<sup>19</sup>F NMR

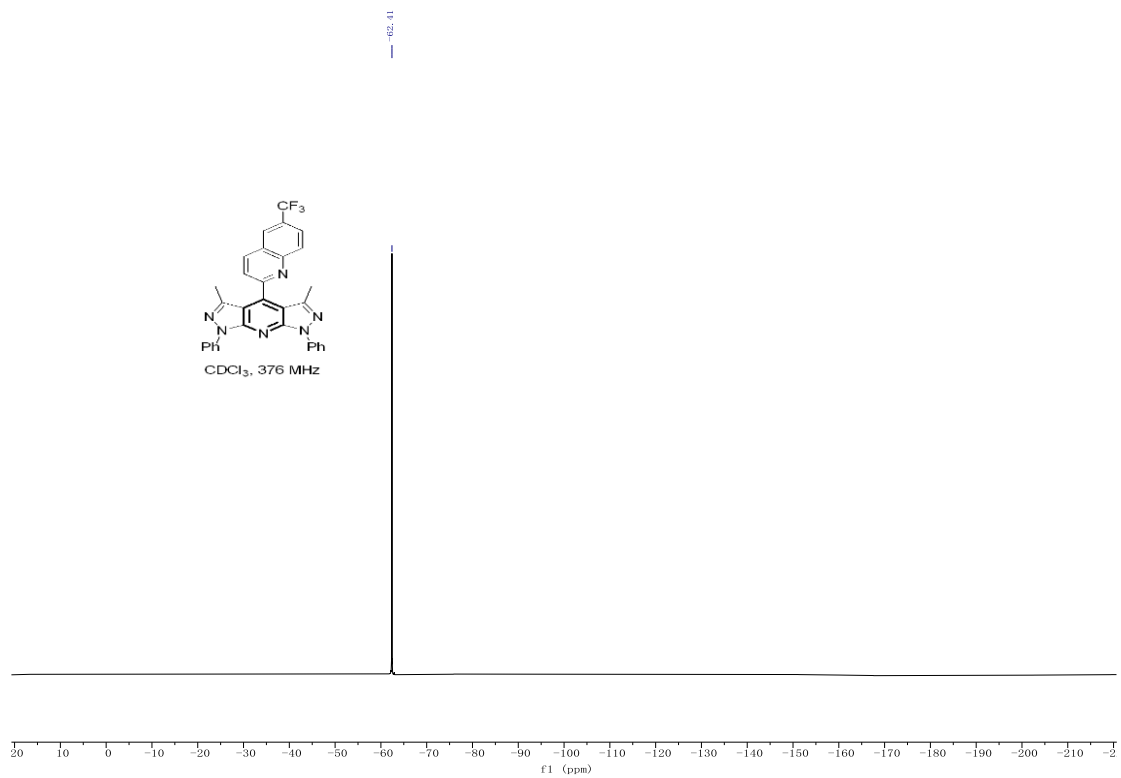

**3ja-<sup>1</sup>H NMR**

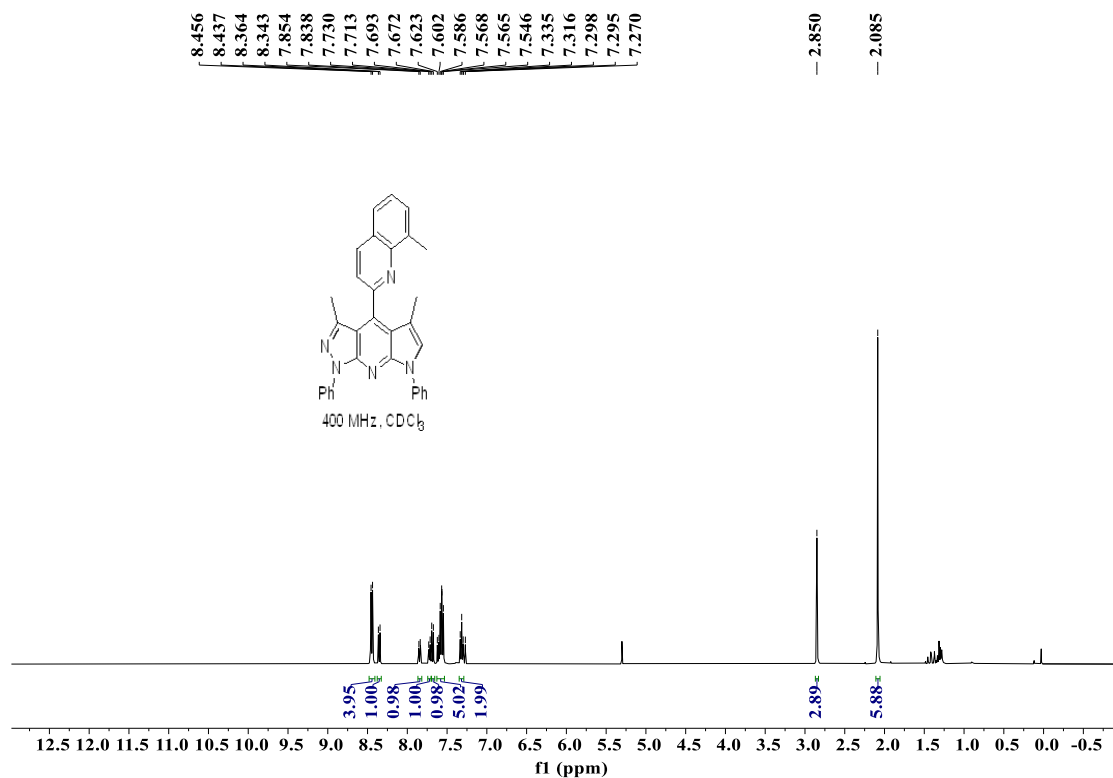

**3ja-<sup>13</sup>C NMR**

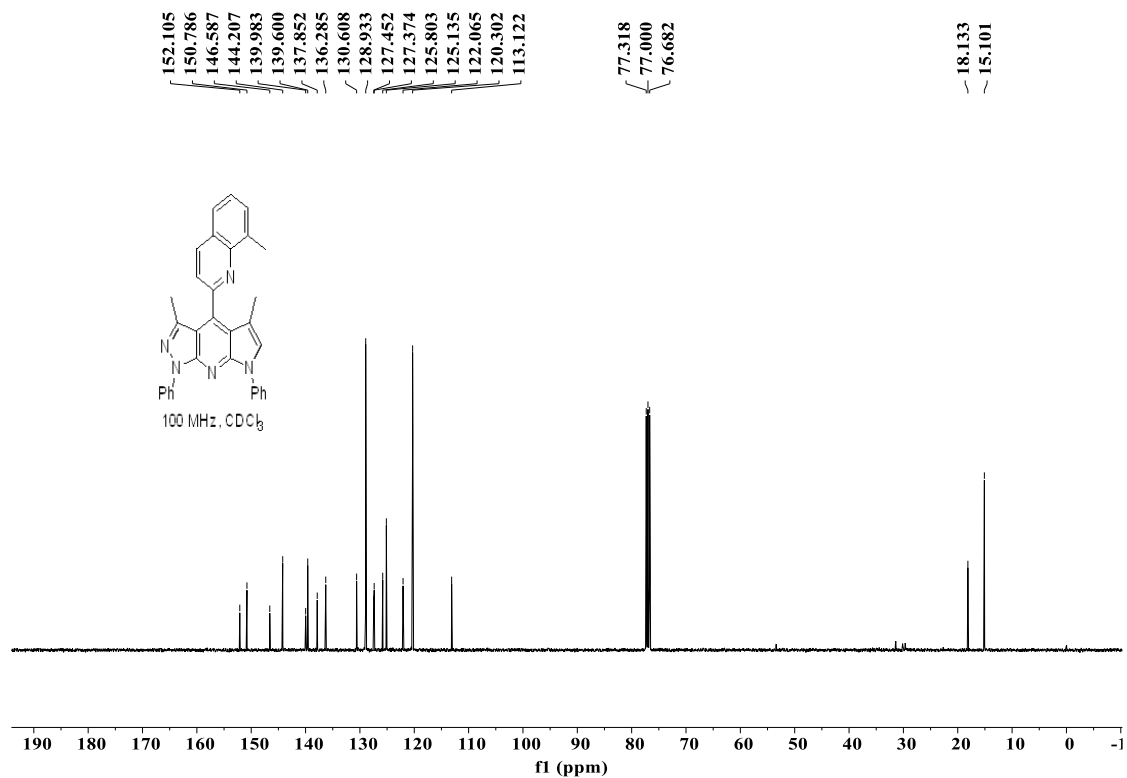

3ka-<sup>1</sup>H NMR

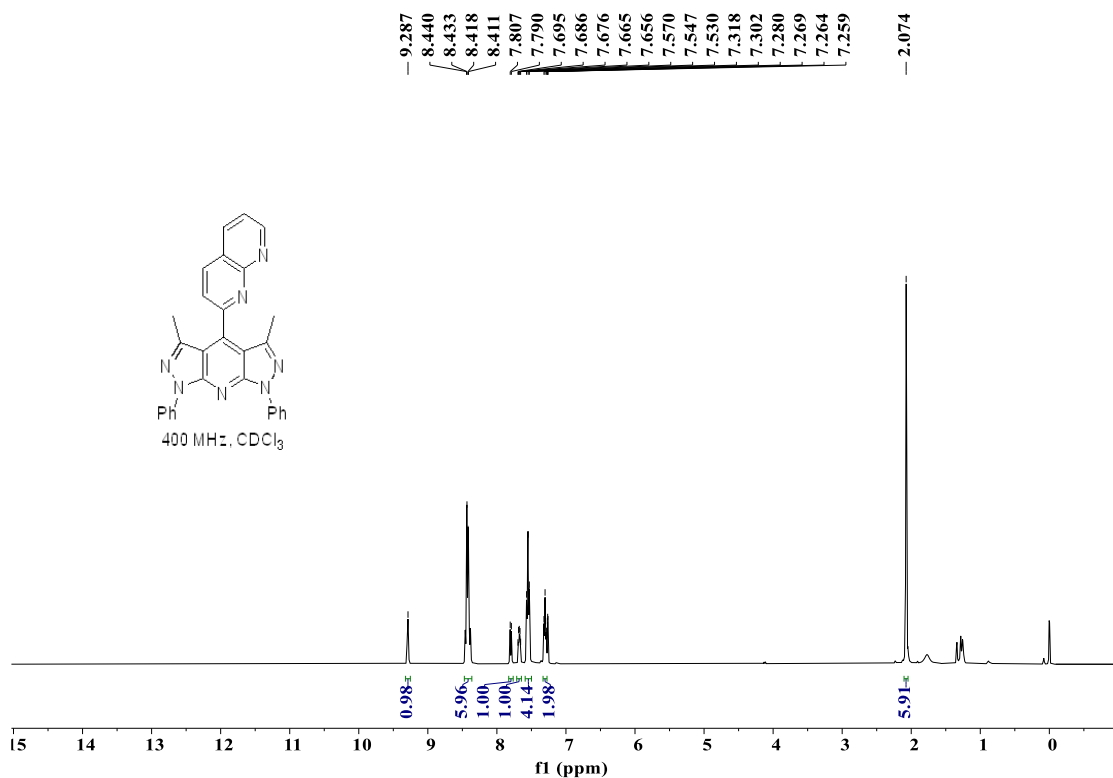

3ka-<sup>13</sup>C NMR

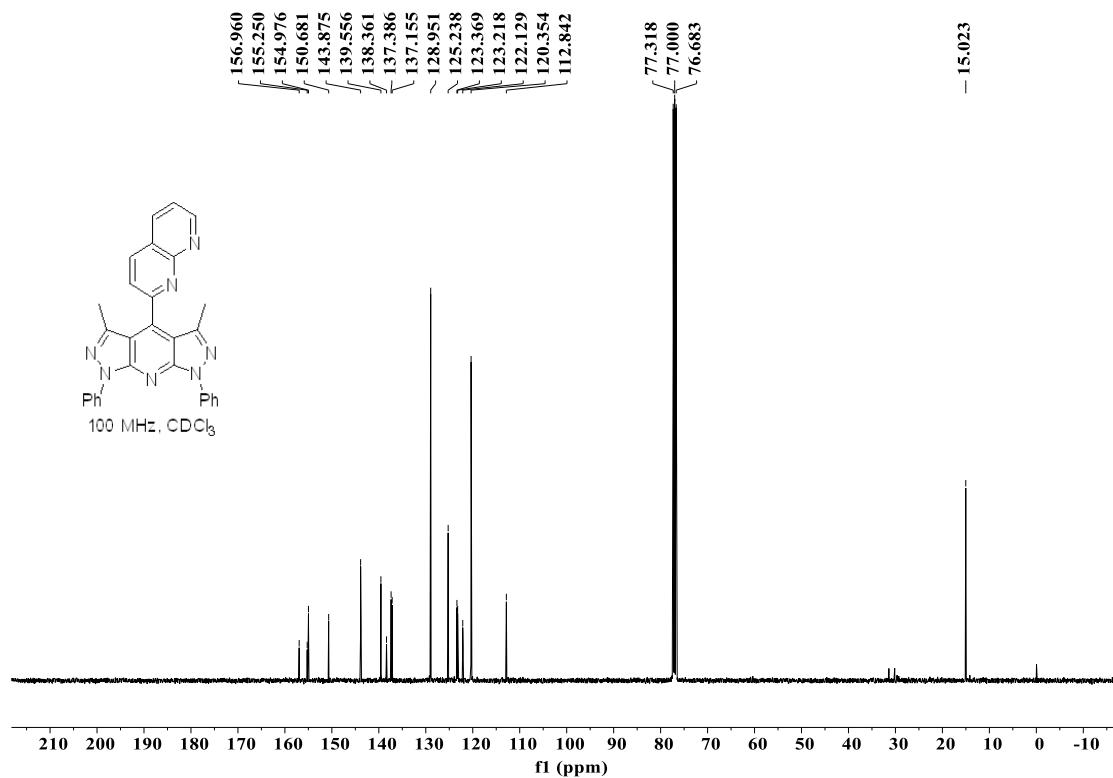

**3la-<sup>1</sup>H NMR**

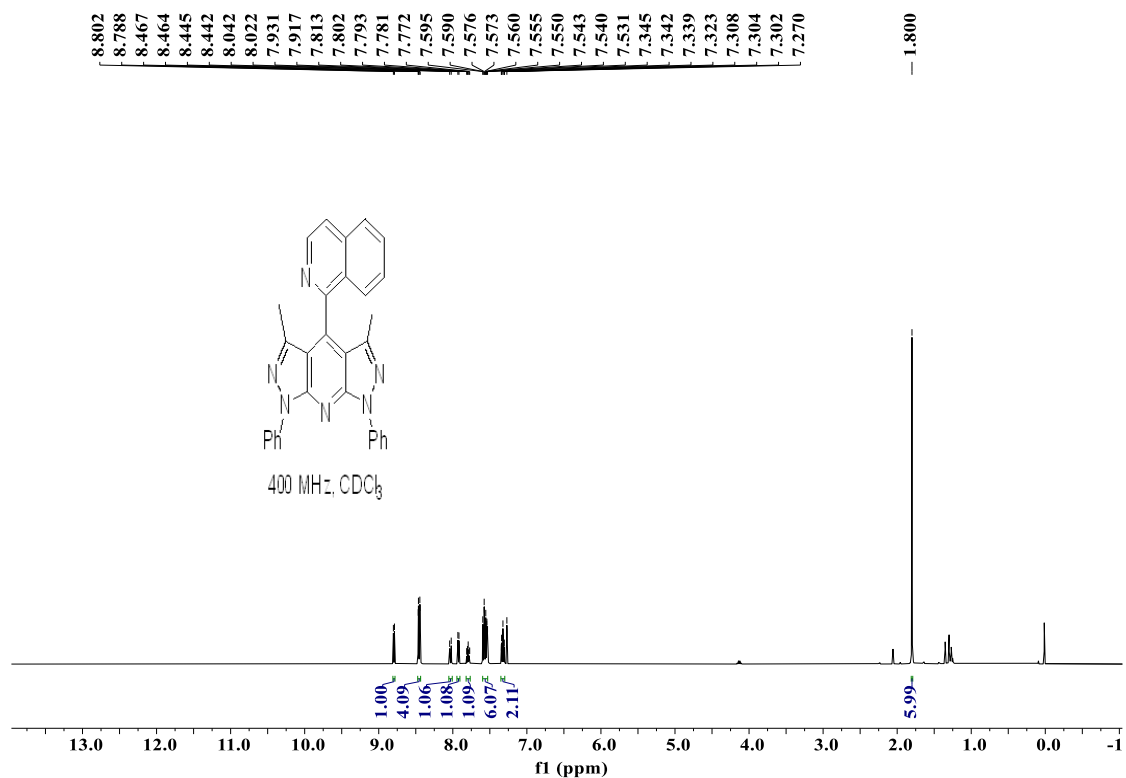

**3la-<sup>13</sup>C NMR**

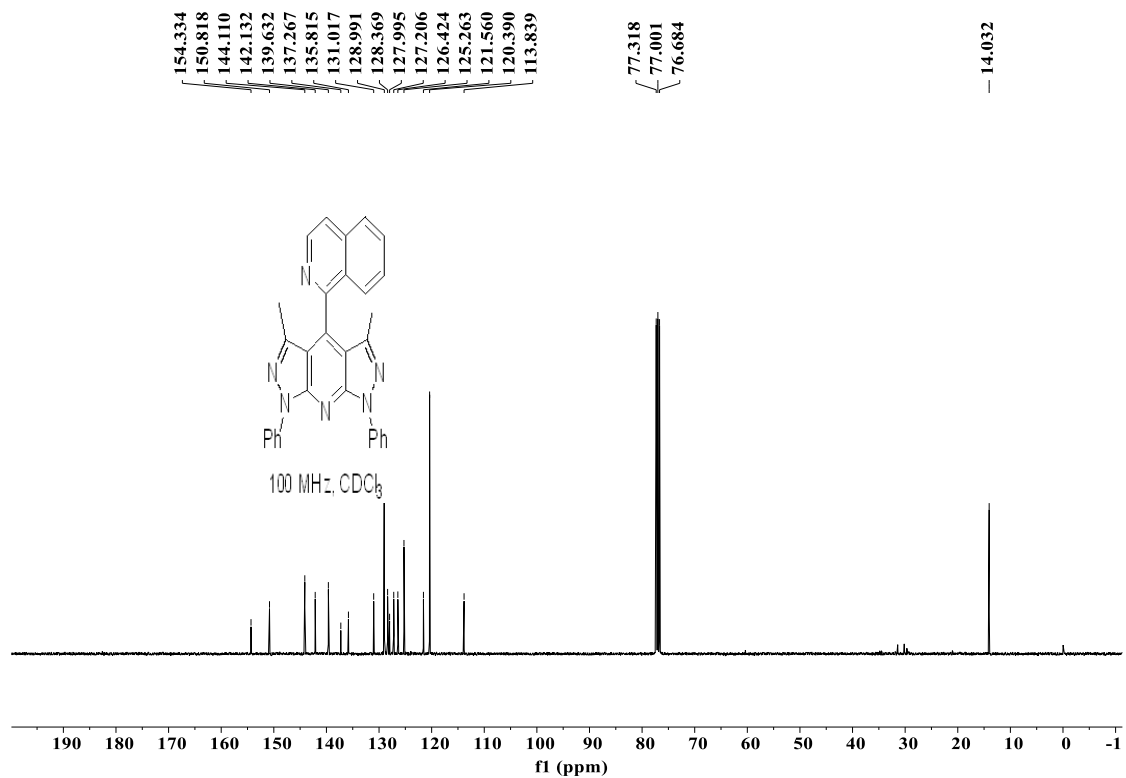

### 3ma-<sup>1</sup>H NMR

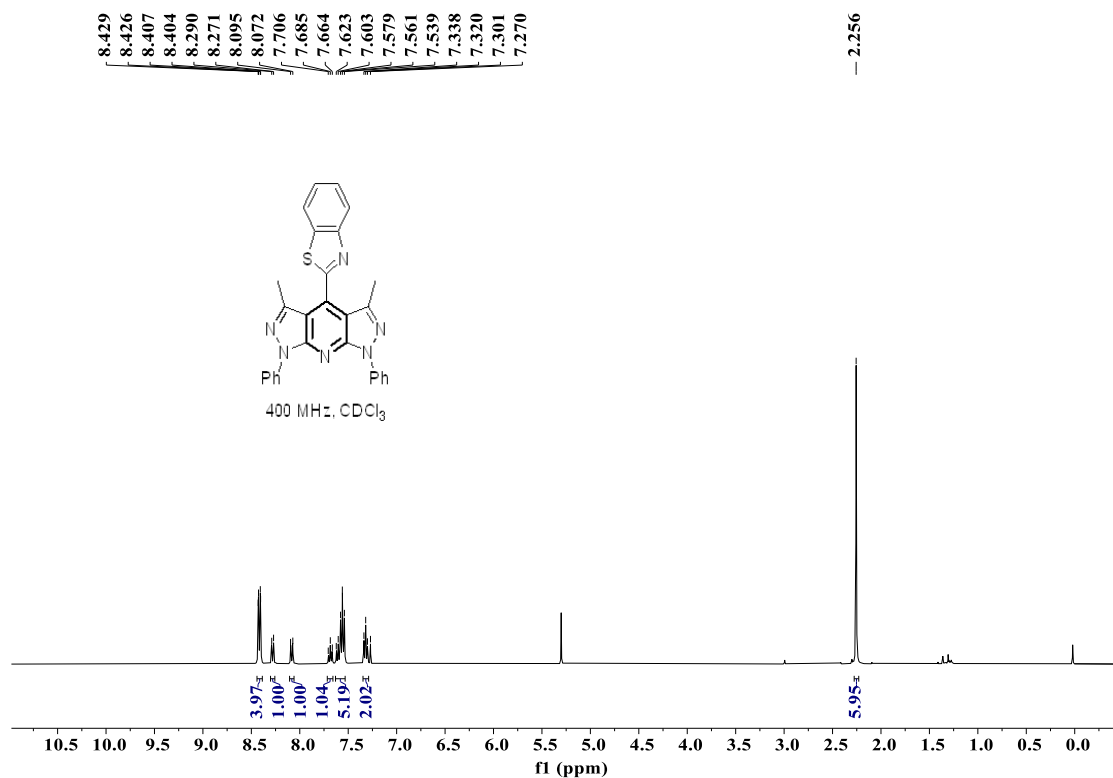

### 3ma-<sup>13</sup>C NMR

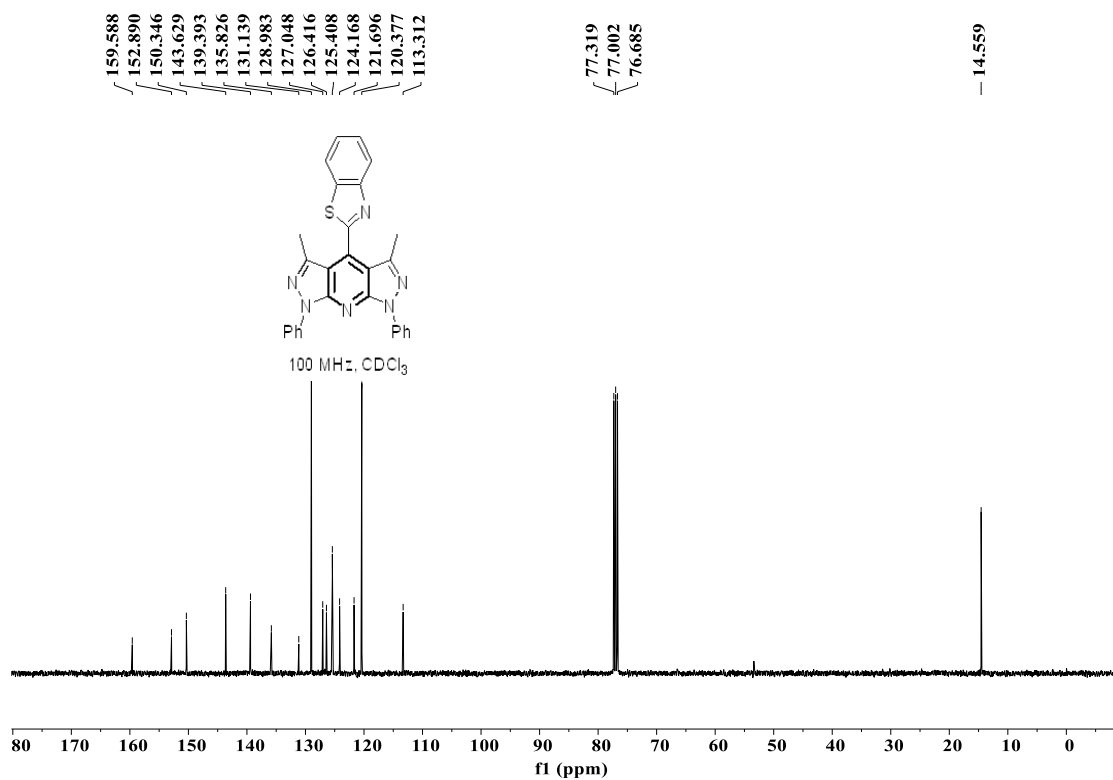

### 3ab-<sup>1</sup>H NMR

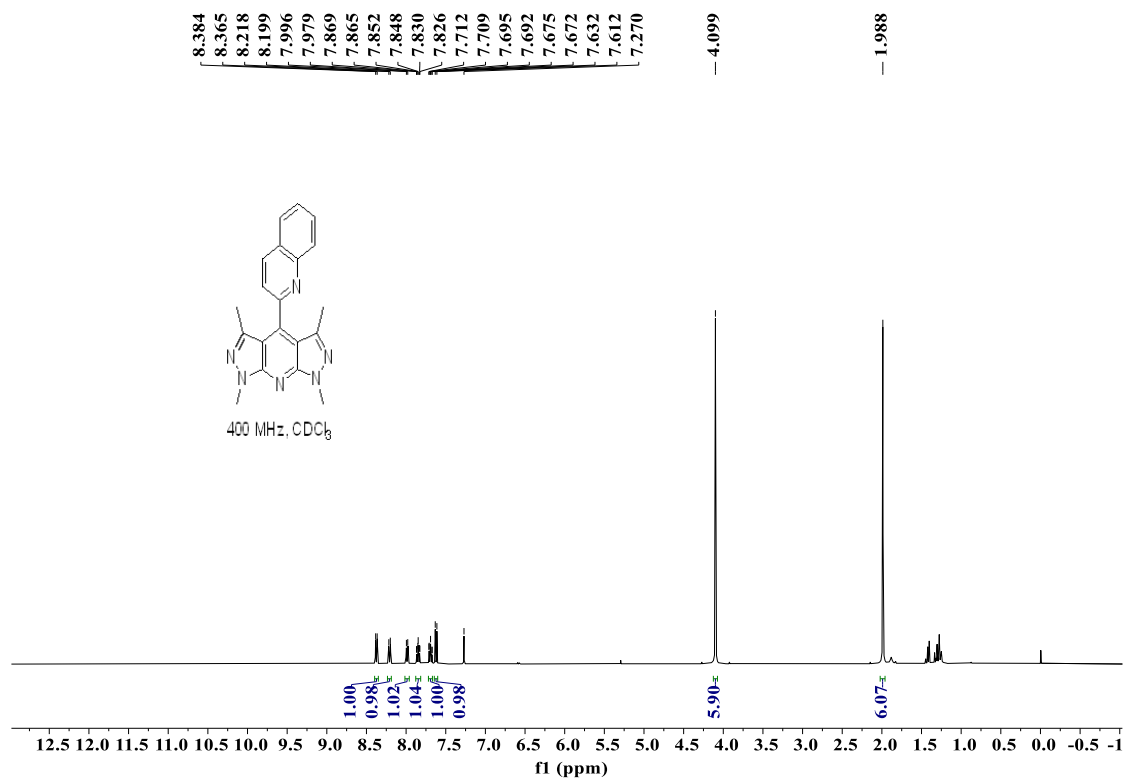

### 3ab-<sup>13</sup>C NMR

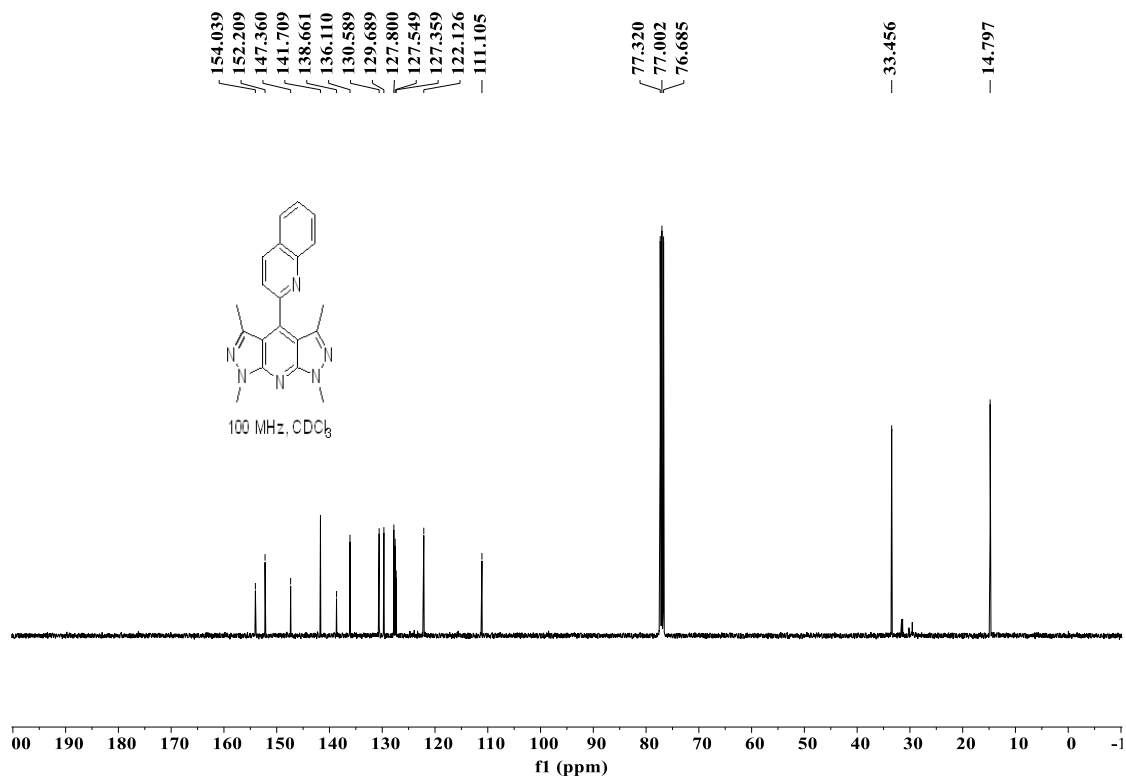

5aa-<sup>1</sup>H NMR

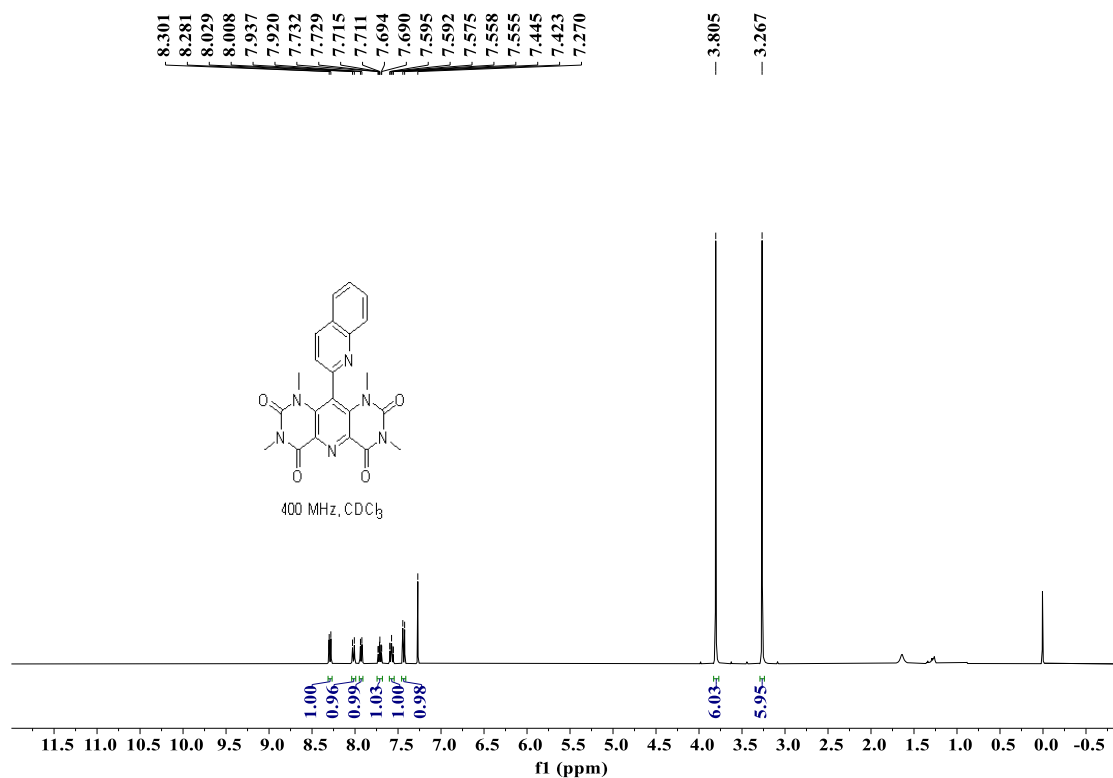

5aa-<sup>13</sup>C NMR

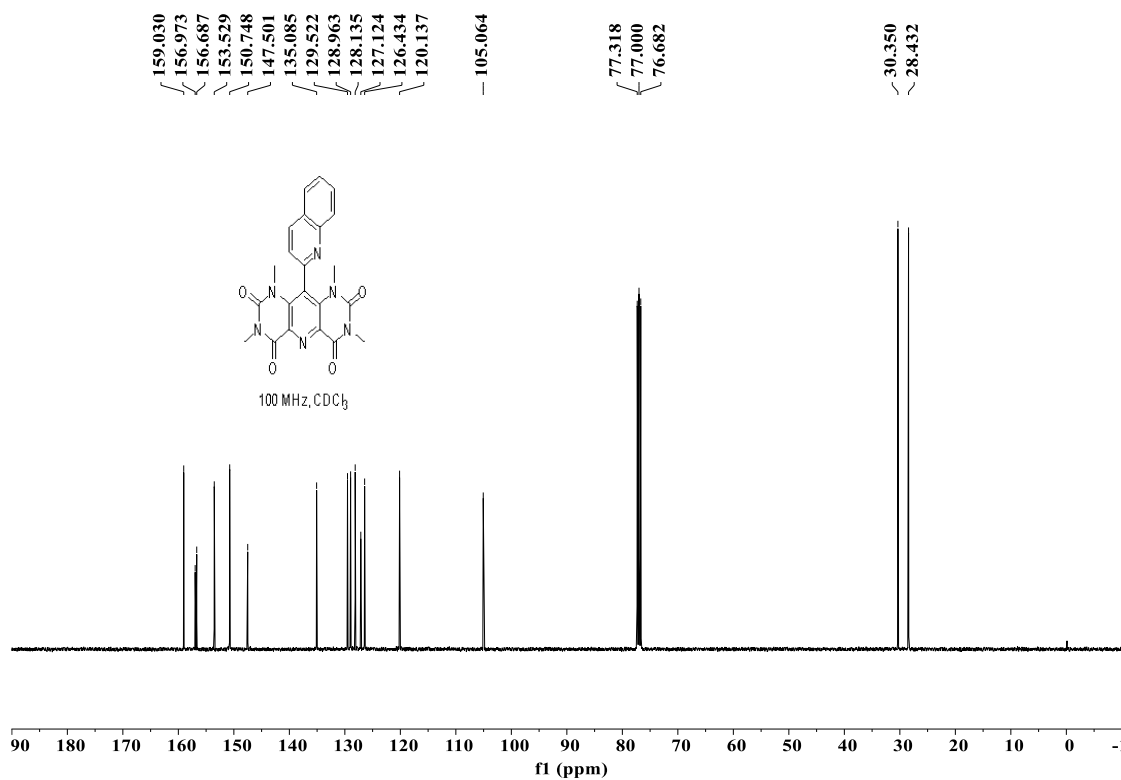



5ba-<sup>1</sup>H NMR

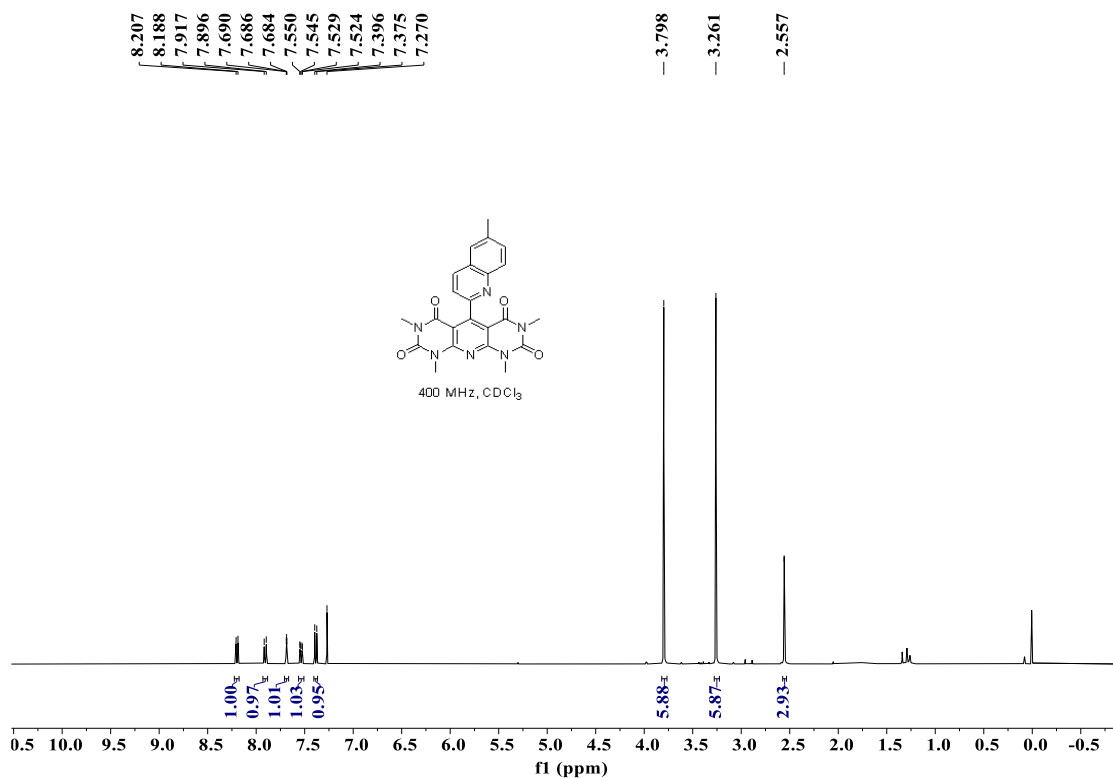

5ba-<sup>13</sup>C NMR

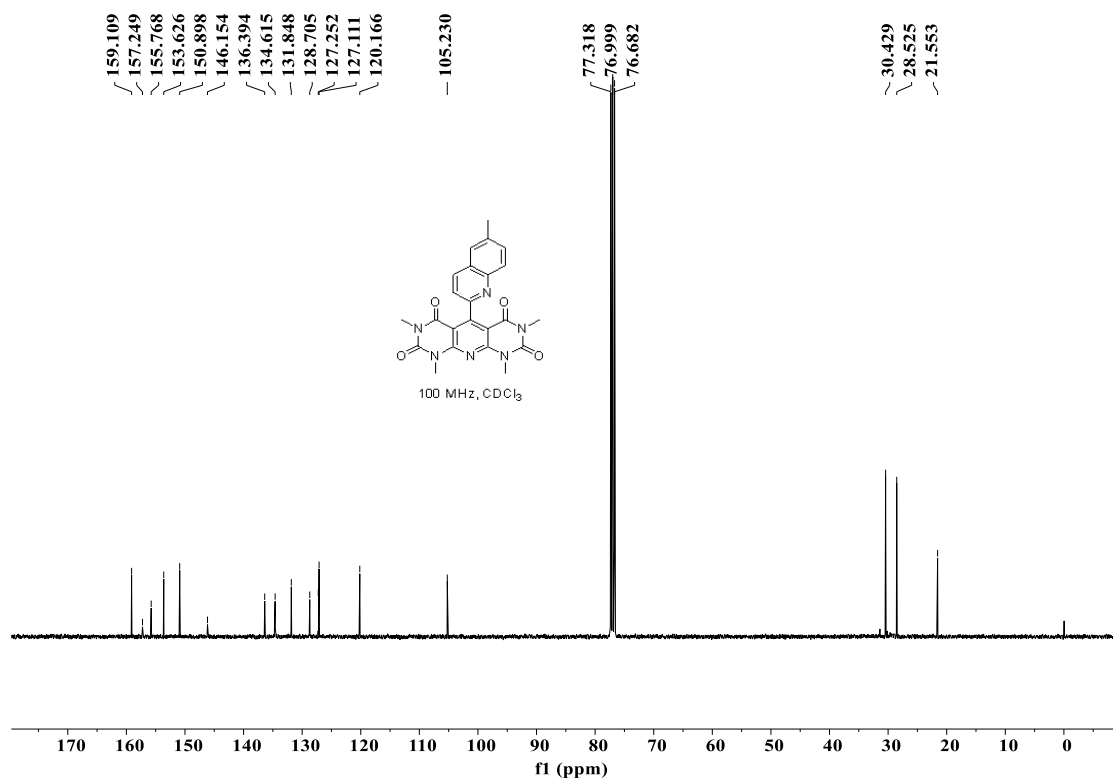

5da-<sup>1</sup>H NMR

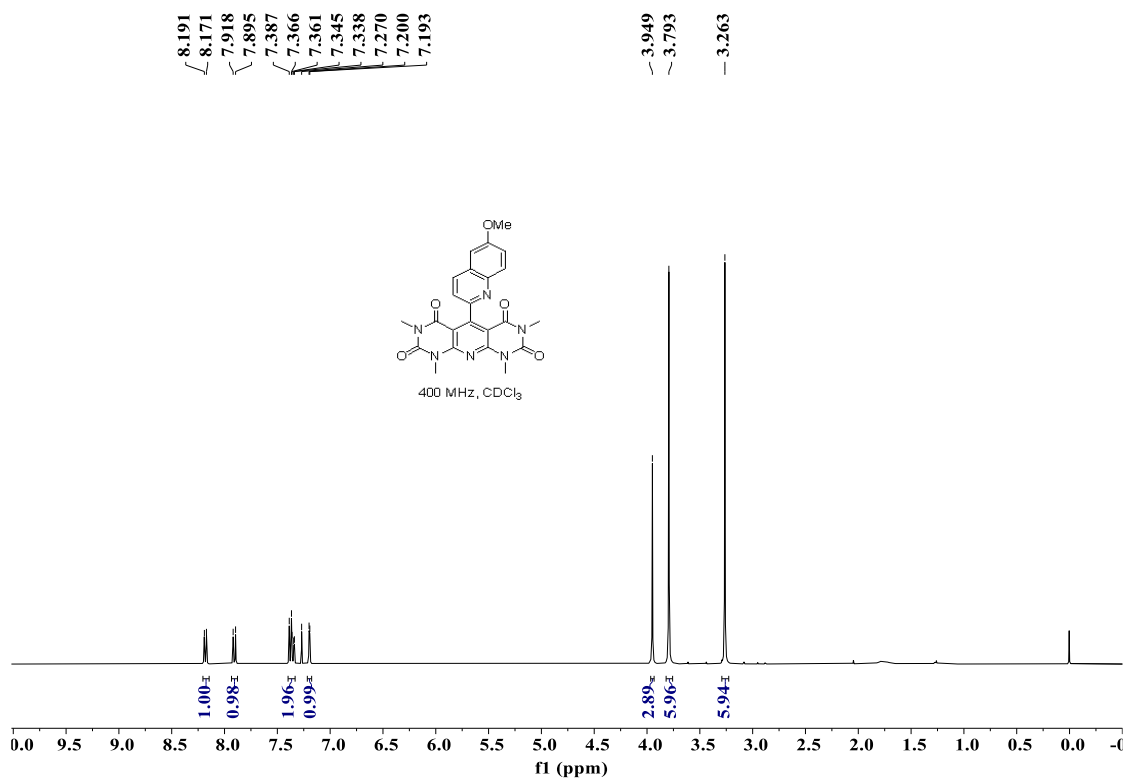

5da-<sup>13</sup>C NMR

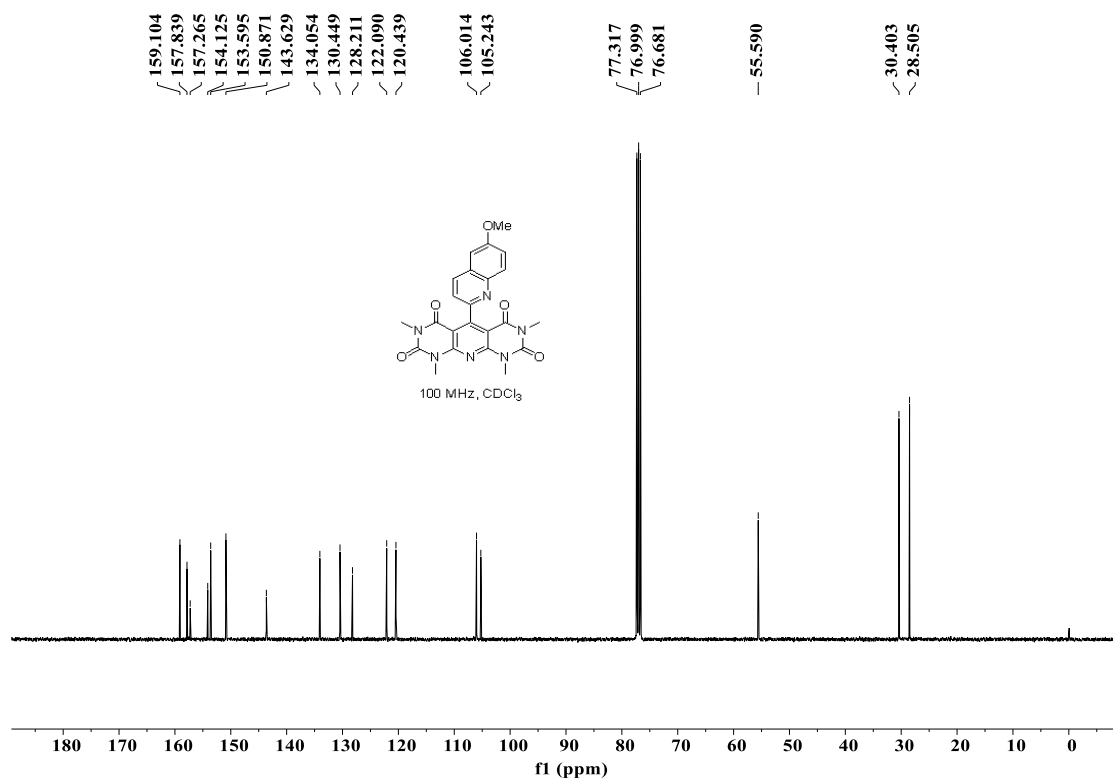

### 5ga-<sup>1</sup>H NMR

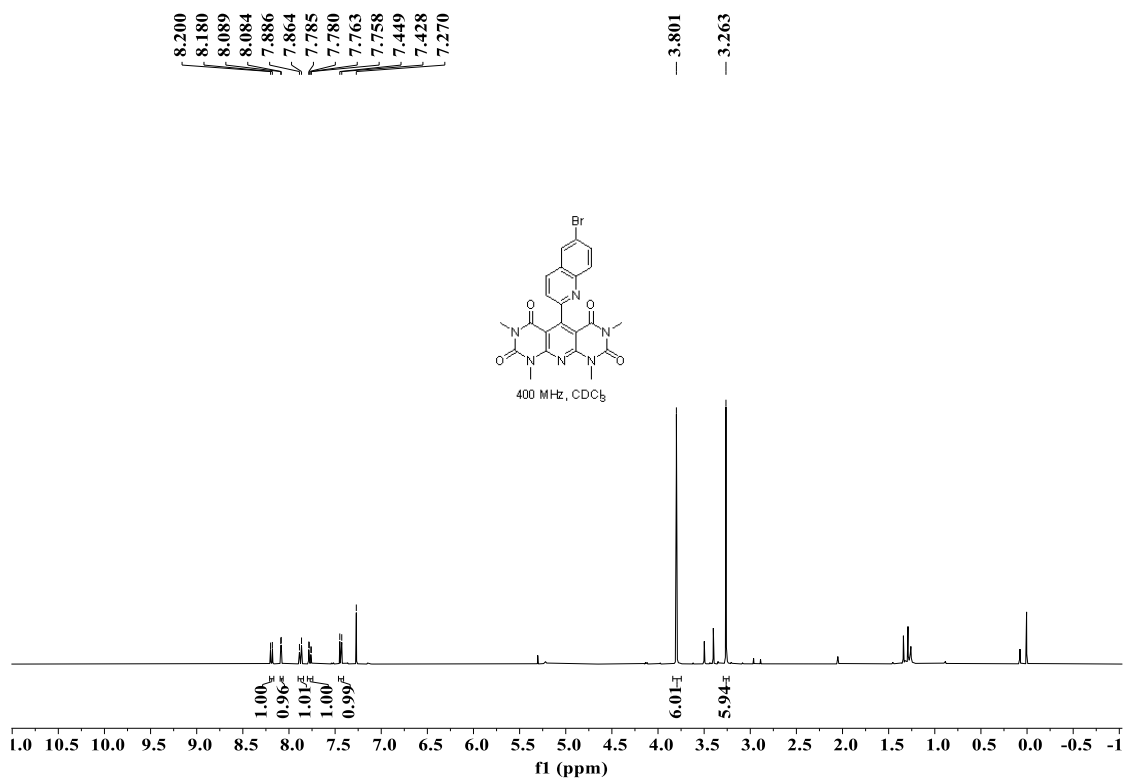

### 5ga-<sup>13</sup>C NMR

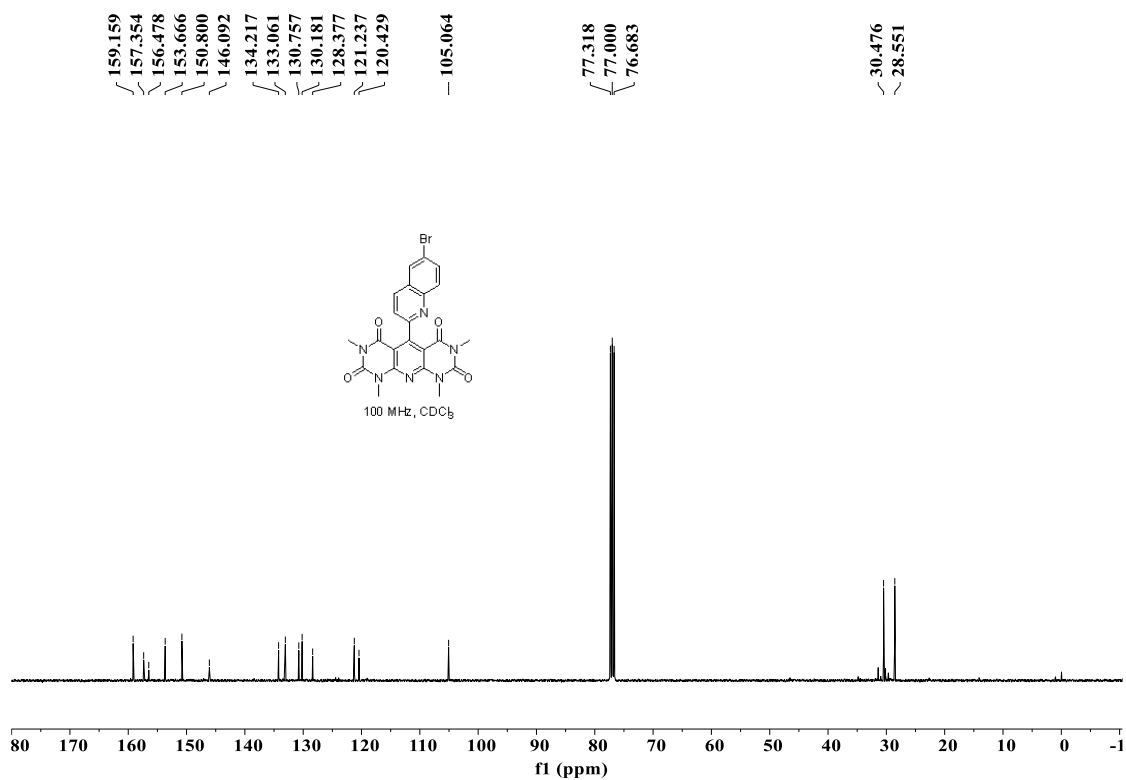

7aa-<sup>1</sup>H NMR

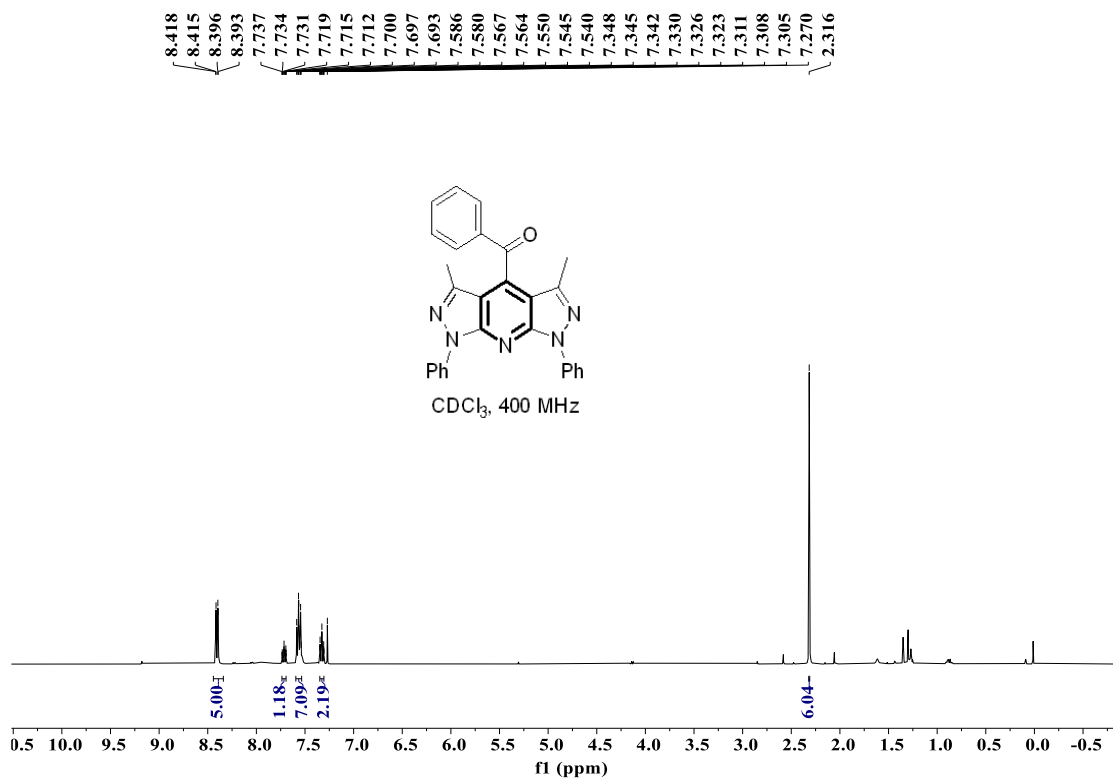

7aa-<sup>13</sup>C NMR

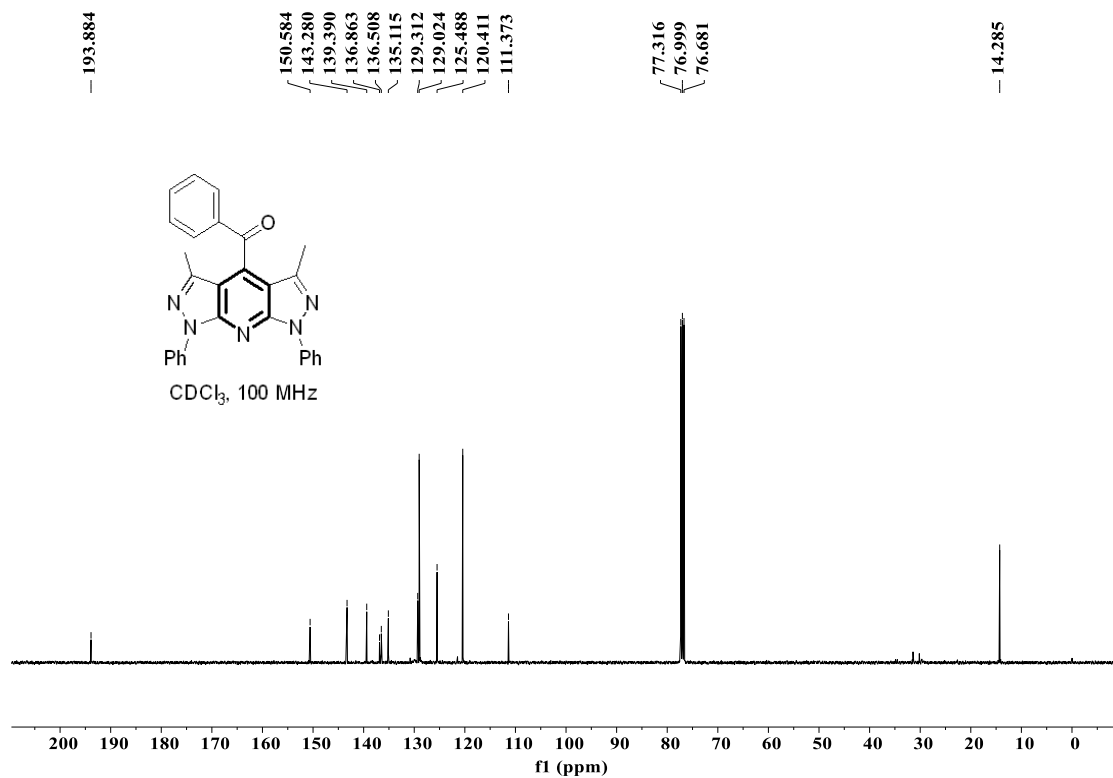

7ba-<sup>1</sup>H NMR

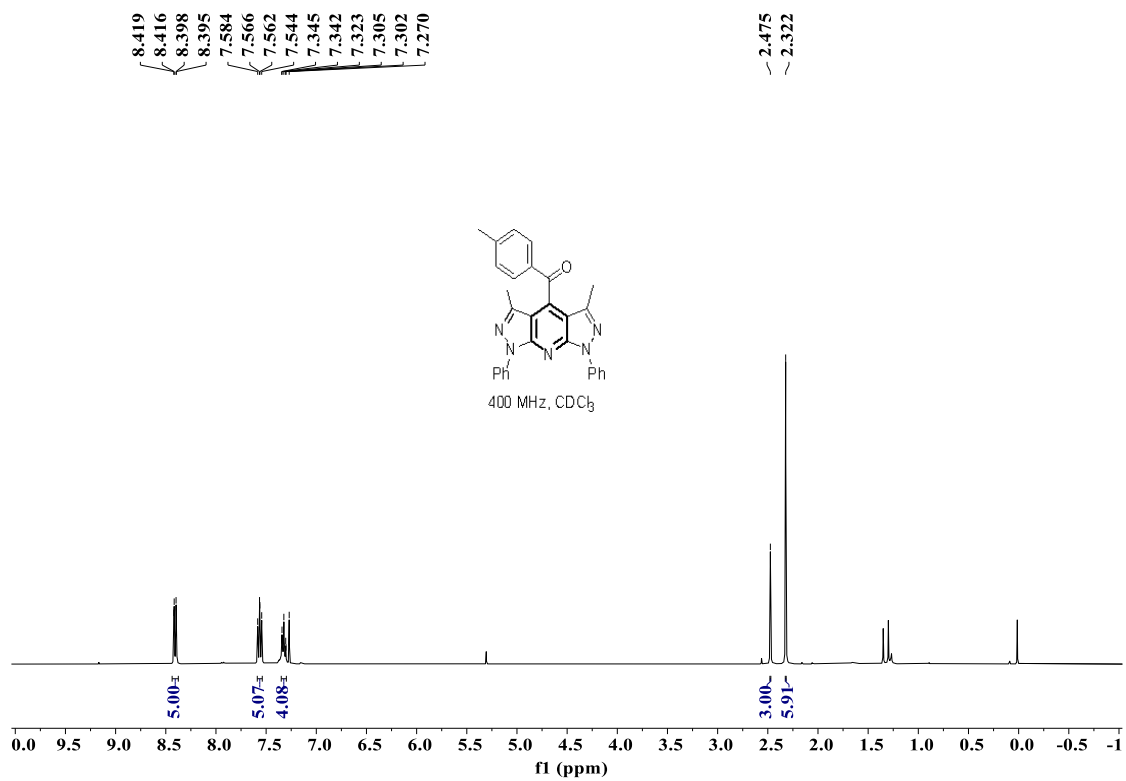

7ba-<sup>13</sup>C NMR

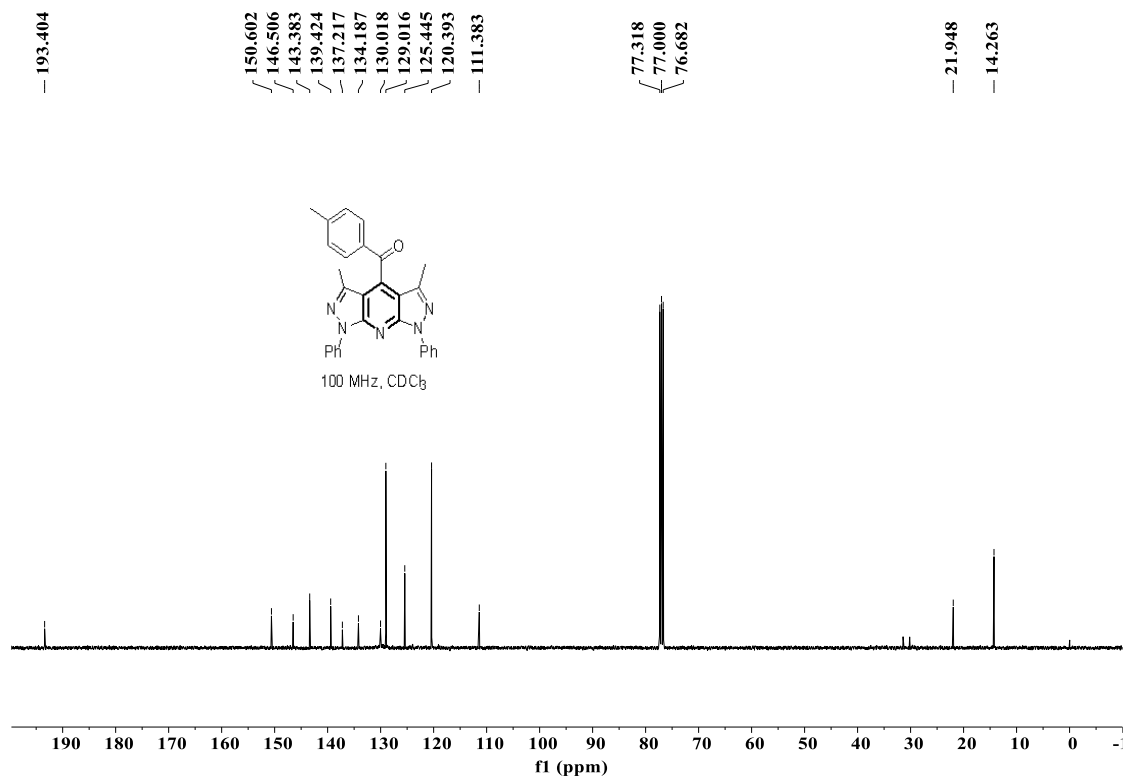

**7ca-<sup>1</sup>H NMR**

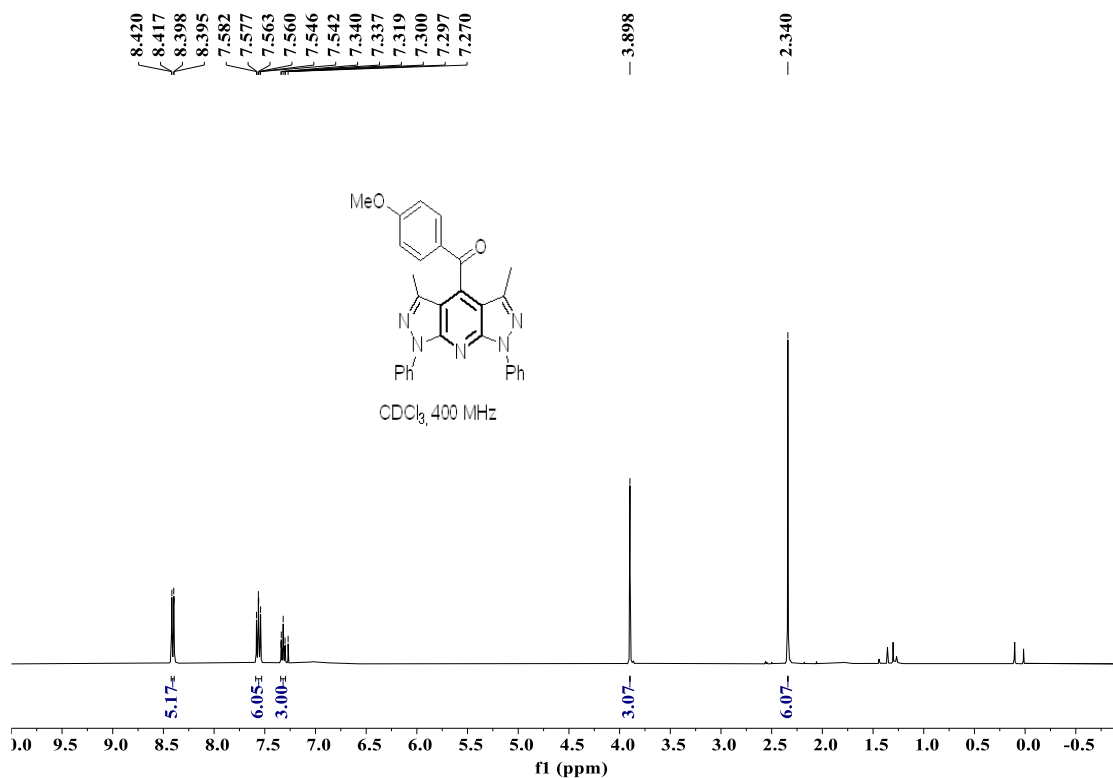

**7ca-<sup>13</sup>C NMR**

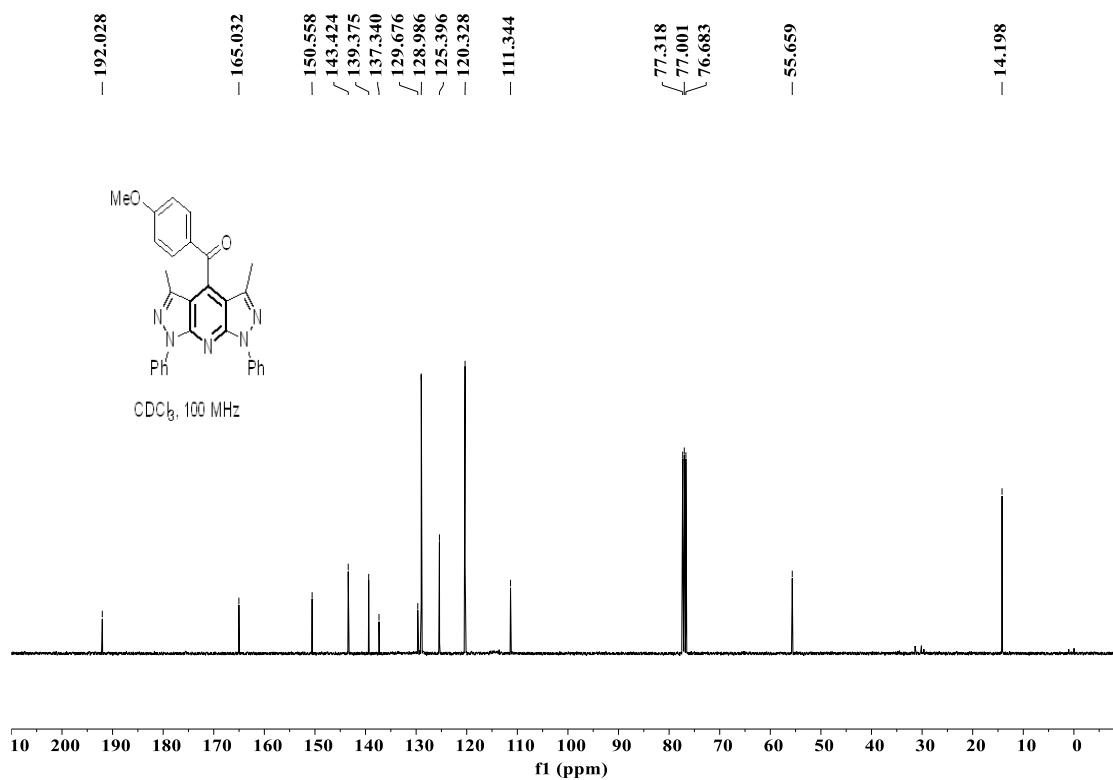

7da-<sup>1</sup>H NMR

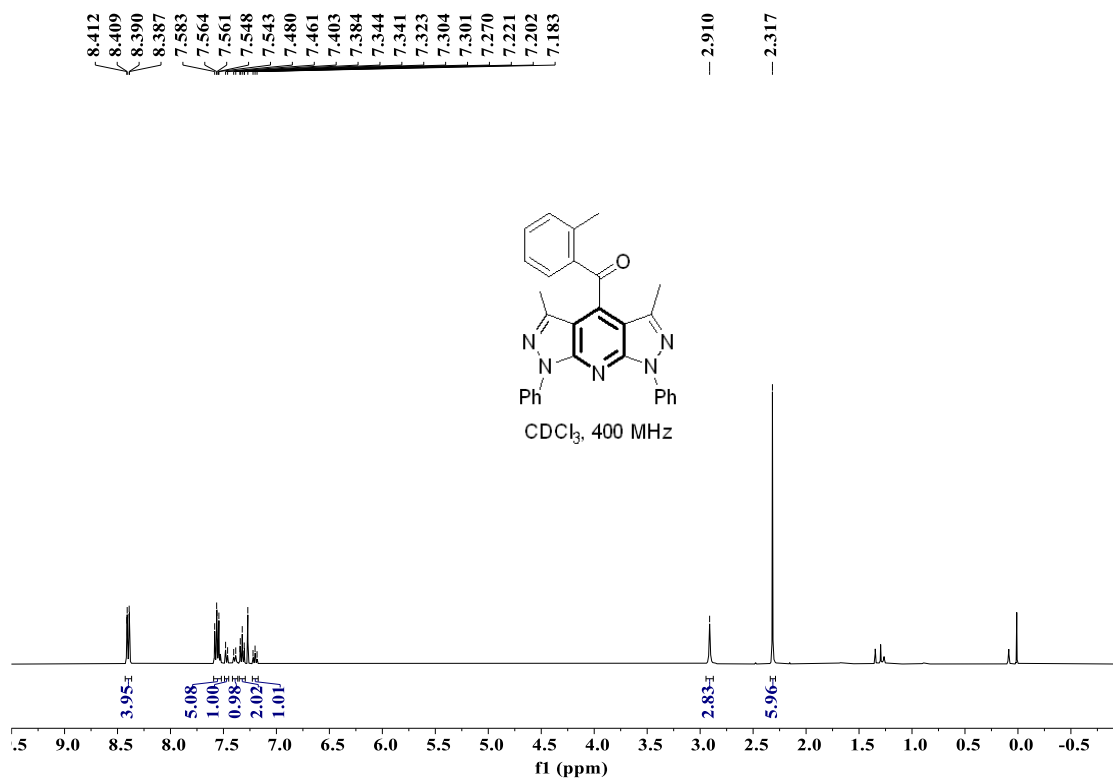

7da-<sup>13</sup>C NMR

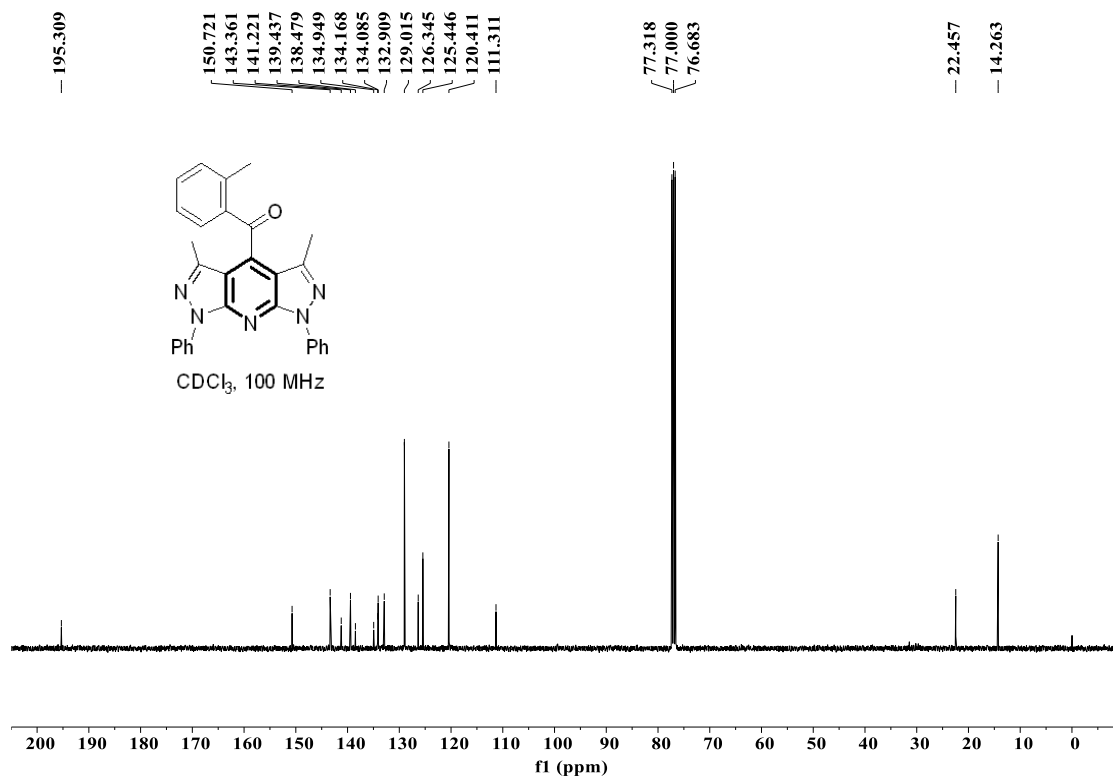

7ea-<sup>1</sup>H NMR

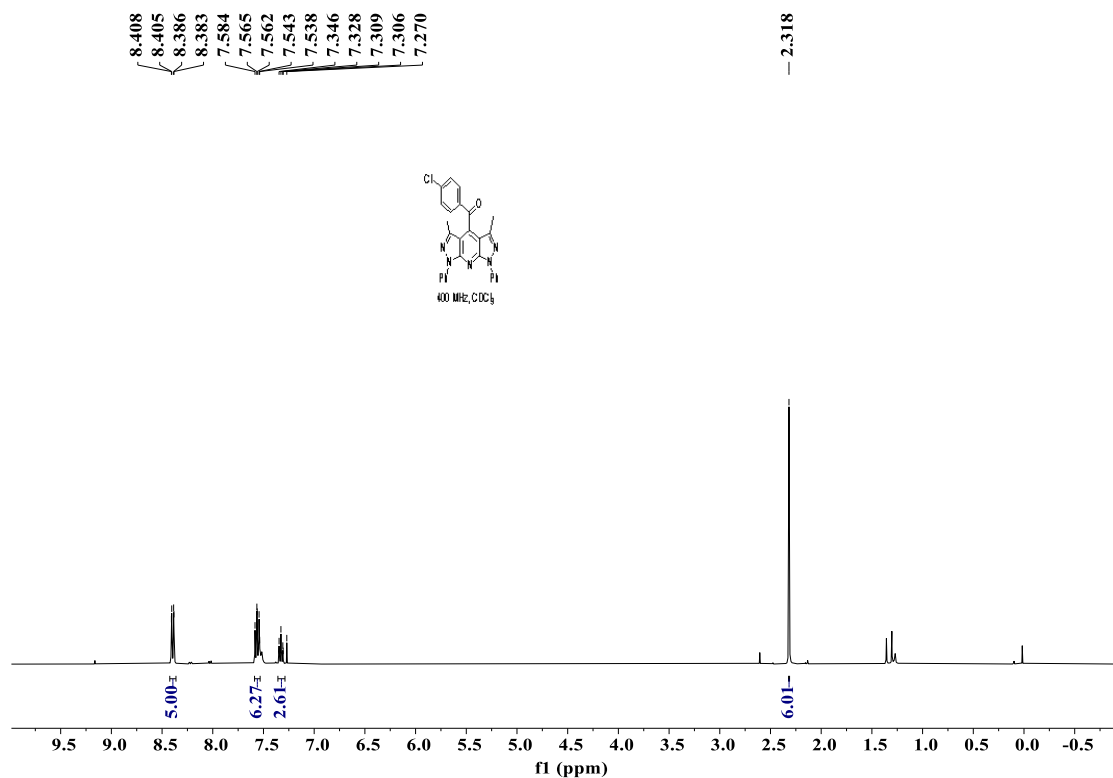

7ea-<sup>13</sup>C NMR

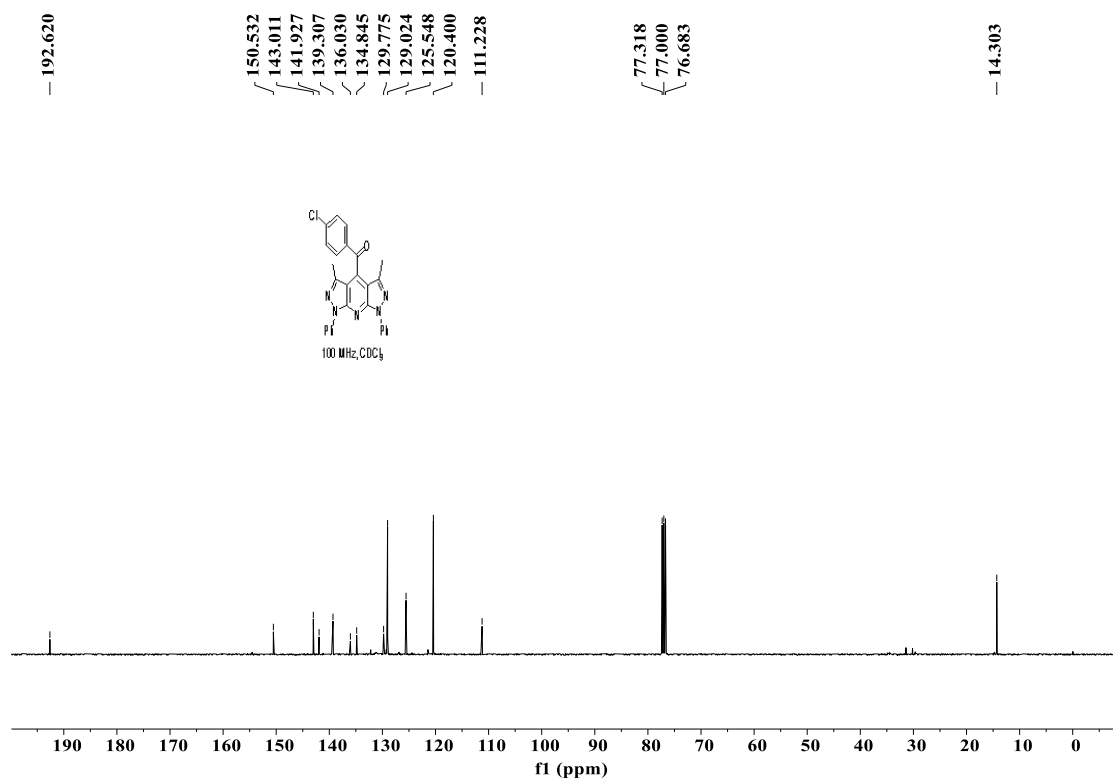



7fa-<sup>1</sup>H NMR

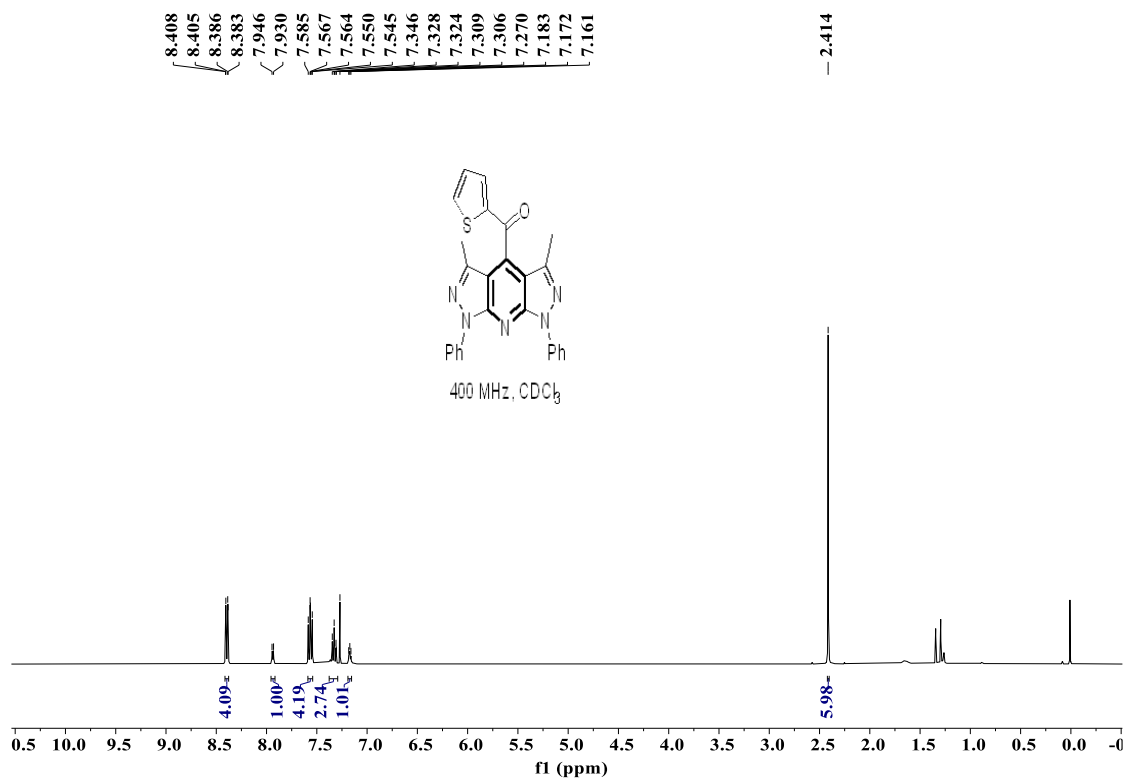

7fa-<sup>13</sup>C NMR

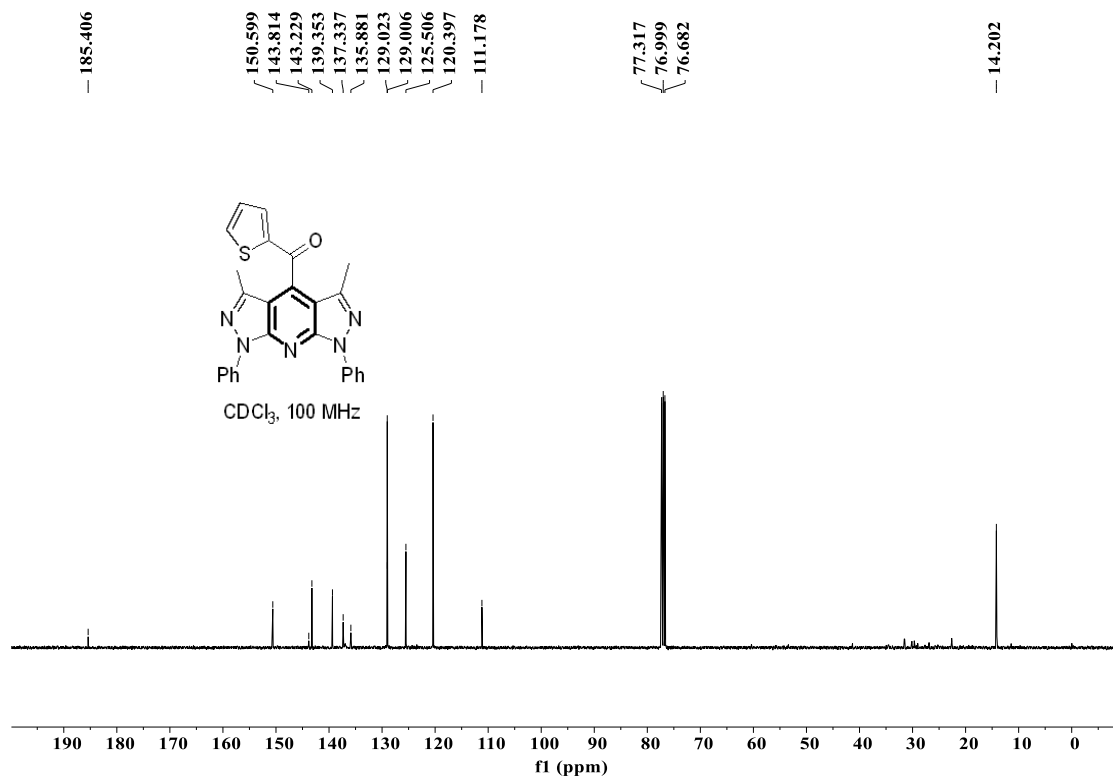

Supplement: d1qo01641e1.pdf [file d1qo01641e1.pdf]
